# Supplementary material for: Conserved SARS-CoV-2 Viral Peptides as Potential Prophylactic and Therapeutic Targets
Source: Research Square preprint supplement (doi:10.21203/rs.3.rs-6798845/v1), 2025-06-17
Supplement: Supplementary file 1 [file 3bebe32bd494cc3d9c404071.xlsx]

## Sheet: Frequency
	S No	Protein	Length	Cut off level	No of conserved sequences
	1	Spike	1273	Original	0
		Spike	1273	0.001	49
	2	Envelope	75	Original	0
		Envelope	75	0.001	2
	3	Membrane	222	Original	0
		Membrane	222	0.001	7
	4	Nucleocapsid	419	Original	0
		Nucleocapsid	419	0.001	14
	5	NSP1	180	Original	0
		NSP1	180	0.001	7
	6	NSP2	638	Original	0
		NSP2	638	0.001	0
	7	NSP3	1945	Original	0
		NSP3	1945	0.001	59
	8	NSP4	500	Original	0
		NSP4	500	0.001	20
	9	NSP5	306	Original	0
		NSP5	306	0.001	11
	10	NSP6	290	Original	0
		NSP6	290	0.001	9
	11	NSP7	83	Original	0
		NSP7	83	0.001	0
	12	NSP8	198	Original	0
		NSP8	198	0.001	1
	13	NSP9	113	Original	0
		NSP9	113	0.001	0
	14	NSP10	139	Original	0
		NSP10	139	0.001	0
	15	NSP12	932	Original	0
		NSP12	932	0.001	31
	16	NSP13	601	Original	0
		NSP13	601	0.001	24
	17	NSP14	527	Original	0
		NSP14	527	0.001	22
	18	NSP15	346	Original	0
		NSP15	346	0.001	14
	19	NSP16	298	Original	0
		NSP16	298	0.001	0
		Total			270
		We found no conserved regions when we analysed the data as such. So we decided to assume mutations below a certain “level” would be zero. We tried “below 5 (whole number)”, “below 10(whole number)”, “0.1% of highest frequency”, “1% of highest frequency” across multiple clades and lineages etc during the preliminary stage and later decided to stick with “0.1% of highest frequency” as that gave rea…

## Sheet: NSP1
	S No	General Information					VaxiJen		B cell epitope		Allergenicity	MHC-1
		Seq_no	StartPos	EndPos	Length	Seq	VaxiJen_score	Remarks	B_cell_predicted_sequences	Score	Type	peptide	length	start	end	allele	peptide_index	core	icore	score	percentile
	1	1	1	23	23	MESLVPGFNEKTHVQLSLPVLQV	0.7139	Probable ANTIGEN	PGFNEKTHVQL	0.46	ALLERGEN	MESLVPGF	8	1	8	HLA-B*44:03	1189	MES-LVPGF	MESLVPGF	0.264473	0.45
	2	1	1	23	23	MESLVPGFNEKTHVQLSLPVLQV	0.7139	Probable ANTIGEN	PGFNEKTHVQL	0.46	ALLERGEN	LSLPVLQV	8	16	23	HLA-B*51:01	1258	LSLPV-LQV	LSLPVLQV	0.272344	0.52
	3	1	1	23	23	MESLVPGFNEKTHVQLSLPVLQV	0.7139	Probable ANTIGEN	PGFNEKTHVQL	0.46	ALLERGEN	NEKTHVQL	8	9	16	HLA-B*40:01	1089	NEK-THVQL	NEKTHVQL	0.262513	0.52
	4	1	1	23	23	MESLVPGFNEKTHVQLSLPVLQV	0.7139	Probable ANTIGEN	PGFNEKTHVQL	0.46	ALLERGEN	MESLVPGF	8	1	8	HLA-B*44:02	1135	MES-LVPGF	MESLVPGF	0.1781	0.52
	5	1	1	23	23	MESLVPGFNEKTHVQLSLPVLQV	0.7139	Probable ANTIGEN	PGFNEKTHVQL	0.46	ALLERGEN	NEKTHVQL	8	9	16	HLA-B*08:01	927	NEKTH-VQL	NEKTHVQL	0.178262	0.66
	6	1	1	23	23	MESLVPGFNEKTHVQLSLPVLQV	0.7139	Probable ANTIGEN	PGFNEKTHVQL	0.46	ALLERGEN	NEKTHVQL	8	9	16	HLA-B*44:02	1143	NEK-THVQL	NEKTHVQL	0.071401	0.88
	7	1	1	23	23	MESLVPGFNEKTHVQLSLPVLQV	0.7139	Probable ANTIGEN	PGFNEKTHVQL	0.46	ALLERGEN	MESLVPGF	8	1	8	HLA-B*40:01	1081	MES-LVPGF	MESLVPGF	0.103834	0.95
	8	2	29	36	8	RGFGDSVE	-0.5998	Probable NON-ANTIGEN	NA	NA	NON-ALLERGEN	NA	NA	NA	NA	NA	NA	NA	NA	NA	NA
	9	3	50	59	10	TCGLVEVEKG	1.0034	Probable ANTIGEN	NA	NA	NON-ALLERGEN	NA	NA	NA	NA	NA	NA	NA	NA	NA	NA
	10	4	61	81	21	LPQLEQPYVFIKRSDARTAPH	0.2495	Probable NON-ANTIGEN	EQ, VFIKRSDART	0.482	ALLERGEN	LPQLEQPY	8	1	8	HLA-B*35:01	1047	LPQ-LEQPY	LPQLEQPY	0.472383	0.24
	11	4	61	81	21	LPQLEQPYVFIKRSDARTAPH	0.2495	Probable NON-ANTIGEN	EQ, VFIKRSDART	0.482	ALLERGEN	LPQLEQPY	8	1	8	HLA-B*53:01	1317	LPQLEQP-Y	LPQLEQPY	0.087668	0.84
	12	5	125	134	10	KNGNKGAGGH	1.0379	Probable ANTIGEN	KGA	0.428	NON-ALLERGEN	NA	NA	NA	NA	NA	NA	NA	NA	NA	NA
	13	6	149	165	17	LGTDPYEDFQENWNTKH	0.4546	Probable ANTIGEN	YEDFQENW	0.451	ALLERGEN	YEDFQENW	8	6	13	HLA-B*44:03	1231	YE-DFQENW	YEDFQENW	0.557228	0.21
	14	6	149	165	17	LGTDPYEDFQENWNTKH	0.4546	Probable ANTIGEN	YEDFQENW	0.451	ALLERGEN	YEDFQENW	8	6	13	HLA-B*44:02	1177	YED-FQENW	YEDFQENW	0.454581	0.23
	15	7	167	180	14	SGVTRELMRELNGG	-0.2656	Probable NON-ANTIGEN	R	0.407	ALLERGEN	NA	NA	NA	NA	NA	NA	NA	NA	NA	NA

## Sheet: NSP3
	S No	General Information					VaxiJen		B cell epitope		Allergenicity	MHC-1
		Seq_no	StartPos	EndPos	Length	Seq	VaxiJen_score	Remarks	B_cell_predicted_sequences	Score	Type	peptide	length	start	end	allele	peptide_index	core	icore	score	percentile
	1	1	1	8	8	APTKVTFG	1.4851	Probable ANTIGEN	NA	NA	NON-ALLERGEN	NA	NA	NA	NA	NA	NA	NA	NA	NA	NA
	2	2	10	23	14	DTVIEVQGYKSVNI	0.6786	Probable ANTIGEN	VQGYK	0.433	ALLERGEN	TVIEVQGY	8	2	9	HLA-A*26:01	3411	TVIEV-QGY	TVIEVQGY	0.507942	0.11
	3	2	10	23	14	DTVIEVQGYKSVNI	0.6786	Probable ANTIGEN	VQGYK	0.433	ALLERGEN	TVIEVQGY	8	2	9	HLA-B*35:01	8097	TVIEV-QGY	TVIEVQGY	0.124863	0.88
	4	3	39	47	9	CSAYTVELG	1.0283	Probable ANTIGEN	NA	NA	ALLERGEN	NA	NA	NA	NA	NA	NA	NA	NA	NA	NA
	5	4	75	83	9	LGIDLDEWS	0.0784	Probable NON-ANTIGEN	NA	NA	NON-ALLERGEN	NA	NA	NA	NA	NA	NA	NA	NA	NA	NA
	6	5	96	107	12	FKLASHMYCSFY	0.465	Probable ANTIGEN	NA	NA	NON-ALLERGEN	NA	NA	NA	NA	NA	NA	NA	NA	NA	NA
	7	6	127	140	14	TQYEYGTEDDYQGK	0.9462	Probable ANTIGEN	YGTEDDY	0.484	ALLERGEN	NA	NA	NA	NA	NA	NA	NA	NA	NA	NA
	8	7	157	165	9	QEEDWLDDD	0.6145	Probable ANTIGEN	NA	NA	NON-ALLERGEN	NA	NA	NA	NA	NA	NA	NA	NA	NA	NA
	9	8	217	230	14	TDNVYIKNADIVEE	0.8518	Probable ANTIGEN	TDNVYIKNADIVEE	0.436	ALLERGEN	NA	NA	NA	NA	NA	NA	NA	NA	NA	NA
	10	9	265	272	8	MQVESDDY	0.6031	Probable ANTIGEN	NA	NA	ALLERGEN	NA	NA	NA	NA	NA	NA	NA	NA	NA	NA
	11	10	313	321	9	LKSAYENFN	0.6174	Probable ANTIGEN	NA	NA	ALLERGEN	NA	NA	NA	NA	NA	NA	NA	NA	NA	NA
	12	11	356	363	8	YLAVFDKN	0.5656	Probable ANTIGEN	NA	NA	NON-ALLERGEN	NA	NA	NA	NA	NA	NA	NA	NA	NA	NA
	13	12	435	461	27	LLLYIDINGNLHPDSATLVSDIDITFL	0.6641	Probable ANTIGEN	INGNLHPDSAT, V, DI	0.470	NON-ALLERGEN	HPDSATLV	8	12	19	HLA-B*51:01	9847	HP-DSATLV	HPDSATLV	0.434531	0.26
	14	12	435	461	27	LLLYIDINGNLHPDSATLVSDIDITFL	0.6641	Probable ANTIGEN	INGNLHPDSAT, V, DI	0.470	NON-ALLERGEN	VSDIDITF	8	19	26	HLA-B*58:01	11132	VSD-IDITF	VSDIDITF	0.15951	0.93
	15	13	466	474	9	PYIVGDVVQ	0.2178	Probable NON-ANTIGEN	NA	NA	ALLERGEN	NA	NA	NA	NA	NA	NA	NA	NA	NA	NA
	16	14	512	520	9	PGQGLNGYT	-0.4743	Probable NON-ANTIGEN	NA	NA	ALLERGEN	NA	NA	NA	NA	NA	NA	NA	NA	NA	NA
	17	15	535	557	23	FYILPSIISNEKQEILGTVSWNL	0.9724	Probable ANTIGEN	SIISNEKQEILGT	0.475	NON-ALLERGEN	EILGTVSW	8	14	21	HLA-B*44:03	9447	NA	EILGTVSW	0.355447	0.36
	18	15	535	557	23	FYILPSIISNEKQEILGTVSWNL	0.9724	Probable ANTIGEN	SIISNEKQEILGT	0.475	NON-ALLERGEN	EILGTVSW	8	14	21	HLA-B*44:02	9021	NA	EILGTVSW	0.299969	0.36
	19	15	535	557	23	FYILPSIISNEKQEILGTVSWNL	0.9724	Probable ANTIGEN	SIISNEKQEILGT	0.475	NON-ALLERGEN	EILGTVSW	8	14	21	HLA-B*53:01	10299	EIL-GTVSW	EILGTVSW	0.206197	0.41
	20	15	535	557	23	FYILPSIISNEKQEILGTVSWNL	0.9724	Probable ANTIGEN	SIISNEKQEILGT	0.475	NON-ALLERGEN	FYILPSII	8	1	8	HLA-A*24:02	3044	FYI-LPSII	FYILPSII	0.085176	0.93
	21	16	587	594	8	KYKGIKIQ	0.627	Probable ANTIGEN	NA	NA	ALLERGEN	NA	NA	NA	NA	NA	NA	NA	NA	NA	NA
	22	17	620	627	8	LNDLNETL	0.5956	Probable ANTIGEN	NA	NA	ALLERGEN	NA	NA	NA	NA	NA	NA	NA	NA	NA	NA
	23	18	661	677	17	SPDAVTAYNGYLTSSSK	0.4129	Probable ANTIGEN	YNGYLT	0.423	ALLERGEN	SPDAVTAY	8	1	8	HLA-B*35:01	8174	SP-DAVTAY	SPDAVTAY	0.800058	0.08
	24	18	661	677	17	SPDAVTAYNGYLTSSSK	0.4129	Probable ANTIGEN	YNGYLT	0.423	ALLERGEN	SPDAVTAY	8	1	8	HLA-B*53:01	10304	SPD-AVTAY	SPDAVTAY	0.165899	0.51
	25	19	693	713	21	YKDWSYSGQSTQLGIEFLKRG	1.5781	Probable ANTIGEN	SYSGQSTQLGIEF	0.497	ALLERGEN	NA	NA	NA	NA	NA	NA	NA	NA	NA	NA
	26	20	740	748	9	TLLSLREVR	1.7234	Probable ANTIGEN	NA	NA	NON-ALLERGEN	NA	NA	NA	NA	NA	NA	NA	NA	NA	NA
	27	21	750	770	21	IKVFTTVDNINLHTQVVDMSM	0.4863	Probable ANTIGEN	DNINLHTQVV	0.459	NON-ALLERGEN	NA	NA	NA	NA	NA	NA	NA	NA	NA	NA
	28	22	780	793	14	YLDGADVTKIKPHN	0.764	Probable ANTIGEN	DVTKI	0.435	ALLERGEN	DGADVTKI	8	3	10	HLA-B*51:01	9920	DGADV-TKI	DGADVTKI	0.501884	0.19
	29	23	795	809	15	HEGKTFYVLPNDDTL	-0.055	Probable NON-ANTIGEN	NA	NA	NON-ALLERGEN	EGKTFYVL	8	2	9	HLA-B*08:01	7370	EGKT-FYVL	EGKTFYVL	0.316738	0.32
	30	24	811	818	8	VEAFEYYH	0.4378	Probable ANTIGEN	NA	NA	ALLERGEN	NA	NA	NA	NA	NA	NA	NA	NA	NA	NA
	31	25	823	836	14	SFLGRYMSALNHTK	0.4793	Probable ANTIGEN	NA	NA	ALLERGEN	NA	NA	NA	NA	NA	NA	NA	NA	NA	NA
	32	26	846	859	14	LTSIKWADNNCYLA	1.1968	Probable ANTIGEN	KWADNN	0.431	NON-ALLERGEN	NA	NA	NA	NA	NA	NA	NA	NA	NA	NA
	33	27	866	873	8	QQIELKFN	1.7402	Probable ANTIGEN	NA	NA	ALLERGEN	NA	NA	NA	NA	NA	NA	NA	NA	NA	NA
	34	28	875	895	21	PALQDAYYRARAGEAANFCAL	0.7391	Probable ANTIGEN	YYRARAGEAAN	0.480	NON-ALLERGEN	NA	NA	NA	NA	NA	NA	NA	NA	NA	NA
	35	29	907	915	9	LGDVRETMS	1.0298	Probable ANTIGEN	R	0.401	ALLERGEN	NA	NA	NA	NA	NA	NA	NA	NA	NA	NA
	36	30	917	935	19	LFQHANLDSCKRVLNVVCK	0.002	Probable NON-ANTIGEN	LDSCKR	0.433	NON-ALLERGEN	NA	NA	NA	NA	NA	NA	NA	NA	NA	NA
	37	31	952	966	15	YMGTLSYEQFKKGVQ	0.5198	Probable ANTIGEN	SYEQFK	0.434	NON-ALLERGEN	NA	NA	NA	NA	NA	NA	NA	NA	NA	NA
	38	32	977	984	8	KYLVQQES	-0.4692	Probable NON-ANTIGEN	NA	NA	NON-ALLERGEN	NA	NA	NA	NA	NA	NA	NA	NA	NA	NA
	39	33	1007	1021	15	SEYTGNYQCGHYKHI	0.4883	Probable ANTIGEN	GNYQCGH	0.453	NON-ALLERGEN	NA	NA	NA	NA	NA	NA	NA	NA	NA	NA
	40	34	1023	1032	10	SKETLYCIDG	1.1069	Probable ANTIGEN	NA	NA	ALLERGEN	NA	NA	NA	NA	NA	NA	NA	NA	NA	NA
	41	35	1045	1062	18	ITDVFYKENSYTTTIKPV	0.5618	Probable ANTIGEN	FYKENSYTTT	0.479	NON-ALLERGEN	VFYKENSY	8	4	11	HLA-A*30:02	4462	VFY-KENSY	VFYKENSY	0.165799	0.85
	42	36	1088	1101	14	YFTEQPIDLVPNQP	0.7682	Probable ANTIGEN	QPIDLV	0.440	ALLERGEN	NA	NA	NA	NA	NA	NA	NA	NA	NA	NA
	43	37	1106	1119	14	SFDNFKFVCDNIKF	1.038	Probable ANTIGEN	CD	0.41	NON-ALLERGEN	NA	NA	NA	NA	NA	NA	NA	NA	NA	NA
	44	38	1135	1149	15	RELKVTFFPDLNGDV	0.3579	Probable NON-ANTIGEN	FFPDL	0.438	ALLERGEN	RELKVTFF	8	1	8	HLA-B*44:03	9596	REL-KVTFF	RELKVTFF	0.189105	0.58
	45	38	1135	1149	15	RELKVTFFPDLNGDV	0.3579	Probable NON-ANTIGEN	FFPDL	0.438	ALLERGEN	RELKVTFF	8	1	8	HLA-B*44:02	9170	REL-KVTFF	RELKVTFF	0.135489	0.61
	46	38	1135	1149	15	RELKVTFFPDLNGDV	0.3579	Probable NON-ANTIGEN	FFPDL	0.438	ALLERGEN	RELKVTFF	8	1	8	HLA-B*40:01	8744	REL-KVTFF	RELKVTFF	0.149634	0.77
	47	39	1151	1159	9	AIDYKHYTP	1.8605	Probable ANTIGEN	NA	NA	ALLERGEN	NA	NA	NA	NA	NA	NA	NA	NA	NA	NA
	48	40	1161	1178	18	FKKGAKLLHKPIVWHVNN	0.5376	Probable ANTIGEN	AKLLHKPI	0.446	NON-ALLERGEN	LLHKPIVW	8	7	14	HLA-A*32:01	5352	LLH-KPIVW	LLHKPIVW	0.122919	0.62
	49	40	1161	1178	18	FKKGAKLLHKPIVWHVNN	0.5376	Probable ANTIGEN	AKLLHKPI	0.446	NON-ALLERGEN	LLHKPIVW	8	7	14	HLA-B*57:01	10890	LLHKPIV-W	LLHKPIVW	0.401654	0.7
	50	40	1161	1178	18	FKKGAKLLHKPIVWHVNN	0.5376	Probable ANTIGEN	AKLLHKPI	0.446	NON-ALLERGEN	LLHKPIVW	8	7	14	HLA-B*58:01	11316	LLHKPIV-W	LLHKPIVW	0.219539	0.72
	51	41	1390	1402	13	KFCLEASFNYLKS	0.6666	Probable ANTIGEN	EASFN	0.453	NON-ALLERGEN	LEASFNYL	8	4	11	HLA-B*40:01	8768	LEA-SFNYL	LEASFNYL	0.301427	0.46
	52	42	1413	1422	10	IWFLLLSVCL	0.4379	Probable ANTIGEN	NA	NA	NON-ALLERGEN	NA	NA	NA	NA	NA	NA	NA	NA	NA	NA
	53	43	1503	1510	8	FGLVAEWF	0.6279	Probable ANTIGEN	NA	NA	ALLERGEN	NA	NA	NA	NA	NA	NA	NA	NA	NA	NA
	54	44	1563	1577	15	VRMYIFFASFYYVWK	0.0652	Probable NON-ANTIGEN	NA	NA	ALLERGEN	MYIFFASF	8	3	10	HLA-A*23:01	2813	MYI-FFASF	MYIFFASF	0.414405	0.22
	55	44	1563	1577	15	VRMYIFFASFYYVWK	0.0652	Probable NON-ANTIGEN	NA	NA	ALLERGEN	MYIFFASF	8	3	10	HLA-A*24:02	3239	MYI-FFASF	MYIFFASF	0.335912	0.32
	56	44	1563	1577	15	VRMYIFFASFYYVWK	0.0652	Probable NON-ANTIGEN	NA	NA	ALLERGEN	FASFYYVW	8	7	14	HLA-B*53:01	10485	FAS-FYYVW	FASFYYVW	0.184176	0.47
	57	44	1563	1577	15	VRMYIFFASFYYVWK	0.0652	Probable NON-ANTIGEN	NA	NA	ALLERGEN	FASFYYVW	8	7	14	HLA-B*58:01	11337	FAS-FYYVW	FASFYYVW	0.301497	0.55
	58	44	1563	1577	15	VRMYIFFASFYYVWK	0.0652	Probable NON-ANTIGEN	NA	NA	ALLERGEN	IFFASFYY	8	5	12	HLA-A*30:02	4519	IFF-ASFYY	IFFASFYY	0.207766	0.68
	59	44	1563	1577	15	VRMYIFFASFYYVWK	0.0652	Probable NON-ANTIGEN	NA	NA	ALLERGEN	FASFYYVW	8	7	14	HLA-B*57:01	10911	FAS-FYYVW	FASFYYVW	0.31335	0.89
	60	45	1579	1587	9	YVHVVDGCN	0.1961	Probable NON-ANTIGEN	NA	NA	ALLERGEN	NA	NA	NA	NA	NA	NA	NA	NA	NA	NA
	61	46	1589	1600	12	STCMMCYKRNRA	1.2931	Probable ANTIGEN	YK	0.406	NON-ALLERGEN	NA	NA	NA	NA	NA	NA	NA	NA	NA	NA
	62	47	1607	1664	58	TIVNGVRRSFYVYANGGKGFCKLHNWNCVNCDTFCAGSTFISDEVARDLSLQFKRPIN	0.3136	Probable NON-ANTIGEN	NGGKGFCKLHNW, VNCDTFCAG	0.471	ALLERGEN	DLSLQFKR	8	48	55	HLA-A*33:01	5855	DLS-LQFKR	DLSLQFKR	0.265443	0.51
	63	47	1607	1664	58	TIVNGVRRSFYVYANGGKGFCKLHNWNCVNCDTFCAGSTFISDEVARDLSLQFKRPIN	0.3136	Probable NON-ANTIGEN	NGGKGFCKLHNW, VNCDTFCAG	0.471	ALLERGEN	EVARDLSL	8	44	51	HLA-B*08:01	7555	EVA-RDLSL	EVARDLSL	0.139373	0.84
	64	48	1684	1692	9	HLYFDKAGQ	0.3697	Probable NON-ANTIGEN	D	0.381	NON-ALLERGEN	NA	NA	NA	NA	NA	NA	NA	NA	NA	NA
	65	49	1694	1710	17	TYERHSLSHFVNLDNLR	0.4635	Probable ANTIGEN	HSLSHFVNL	0.456	NON-ALLERGEN	NA	NA	NA	NA	NA	NA	NA	NA	NA	NA
	66	50	1718	1735	18	LPINVIVFDGKSKCEESS	0.5862	Probable ANTIGEN	NA	NA	NON-ALLERGEN	LPINVIVF	8	1	8	HLA-B*35:01	8427	LPI-NVIVF	LPINVIVF	0.725368	0.11
	67	50	1718	1735	18	LPINVIVFDGKSKCEESS	0.5862	Probable ANTIGEN	NA	NA	NON-ALLERGEN	LPINVIVF	8	1	8	HLA-B*53:01	10557	LPI-NVIVF	LPINVIVF	0.509986	0.13
	68	50	1718	1735	18	LPINVIVFDGKSKCEESS	0.5862	Probable ANTIGEN	NA	NA	NON-ALLERGEN	LPINVIVF	8	1	8	HLA-B*51:01	10131	LPI-NVIVF	LPINVIVF	0.549895	0.15
	69	51	1738	1746	9	SASVYYSQL	0.4664	Probable ANTIGEN	FDGKSKC	0.442	ALLERGEN	NA	NA	NA	NA	NA	NA	NA	NA	NA	NA
	70	52	1748	1758	11	CQPILLLDQAL	0.2018	Probable NON-ANTIGEN	NA	NA	NON-ALLERGEN	NA	NA	NA	NA	NA	NA	NA	NA	NA	NA
	71	53	1778	1785	8	NTFSSTFN	-0.2836	Probable NON-ANTIGEN	NA	NA	NON-ALLERGEN	NA	NA	NA	NA	NA	NA	NA	NA	NA	NA
	72	54	1796	1806	11	ATAEAELAKNV	-0.0004	Probable NON-ANTIGEN	NA	NA	NON-ALLERGEN	EAELAKNV	8	4	11	HLA-B*51:01	10152	EA-ELAKNV	EAELAKNV	0.234418	0.61
	73	55	1808	1819	12	LDNVLSTFISAA	0.0111	Probable NON-ANTIGEN	NA	NA	ALLERGEN	NA	NA	NA	NA	NA	NA	NA	NA	NA	NA
	74	56	1821	1829	9	QGFVDSDVE	0.1358	Probable NON-ANTIGEN	D	0.391	ALLERGEN	NA	NA	NA	NA	NA	NA	NA	NA	NA	NA
	75	57	1831	1840	10	KDVVECLKLS	1.2785	Probable ANTIGEN	NA	NA	ALLERGEN	NA	NA	NA	NA	NA	NA	NA	NA	NA	NA
	76	58	1844	1866	23	DIEVTGDSCNNYMLTYNKVENMT	0.3538	Probable NON-ANTIGEN	TGDSC, KV	0.45	NON-ALLERGEN	TYNKVENM	8	15	22	HLA-A*24:02	3361	TYNKV-ENM	TYNKVENM	0.08091	0.96
	77	59	1893	1945	53	LIWNVKDFMSLSEQLRKQIRSAAKKNNLPFKLTCATTRQVVNVVTTKIALKGG	0.8775	Probable ANTIGEN	VKDFMSLSEQ, RK, NLP, ATTRQVVNV	0.483	NON-ALLERGEN	NVKDFMSL	8	4	11	HLA-B*08:01	7626	NVKD-FMSL	NVKDFMSL	0.439337	0.2
	78	59	1893	1945	53	LIWNVKDFMSLSEQLRKQIRSAAKKNNLPFKLTCATTRQVVNVVTTKIALKGG	0.8775	Probable ANTIGEN	VKDFMSLSEQ, RK, NLP, ATTRQVVNV	0.483	NON-ALLERGEN	SAAKKNNL	8	21	28	HLA-B*08:01	7643	SAAKK-NNL	SAAKKNNL	0.331269	0.31
	79	59	1893	1945	53	LIWNVKDFMSLSEQLRKQIRSAAKKNNLPFKLTCATTRQVVNVVTTKIALKGG	0.8775	Probable ANTIGEN	VKDFMSLSEQ, RK, NLP, ATTRQVVNV	0.483	NON-ALLERGEN	VVTTKIAL	8	43	50	HLA-B*08:01	7665	VVTTKI-AL	VVTTKIAL	0.280331	0.38
	80	59	1893	1945	53	LIWNVKDFMSLSEQLRKQIRSAAKKNNLPFKLTCATTRQVVNVVTTKIALKGG	0.8775	Probable ANTIGEN	VKDFMSLSEQ, RK, NLP, ATTRQVVNV	0.483	NON-ALLERGEN	SEQLRKQI	8	12	19	HLA-B*44:02	9338	SEQ-LRKQI	SEQLRKQI	0.163983	0.55
	81	59	1893	1945	53	LIWNVKDFMSLSEQLRKQIRSAAKKNNLPFKLTCATTRQVVNVVTTKIALKGG	0.8775	Probable ANTIGEN	VKDFMSLSEQ, RK, NLP, ATTRQVVNV	0.483	NON-ALLERGEN	SEQLRKQI	8	12	19	HLA-B*44:03	9764	SEQ-LRKQI	SEQLRKQI	0.115812	0.77
	82	59	1893	1945	53	LIWNVKDFMSLSEQLRKQIRSAAKKNNLPFKLTCATTRQVVNVVTTKIALKGG	0.8775	Probable ANTIGEN	VKDFMSLSEQ, RK, NLP, ATTRQVVNV	0.483	NON-ALLERGEN	VVNVVTTK	8	40	47	HLA-A*03:01	2124	VVN-VVTTK	VVNVVTTK	0.205499	0.91

## Sheet: NSP4
	S No	General Information					VaxiJen		B cell epitope		Allergenicity	MHC-1
		Seq_no	StartPos	EndPos	Length	Seq	VaxiJen_score	Remarks	B_cell_predicted_sequences	Score	Type	peptide	length	start	end	allele	peptide_index	core	icore	score	percentile
	1	1	1	28	28	KIVNNWLKQLIKVTLVFLFVAAIFYLIT	-0.0028	Probable NON-ANTIGEN	KQL	0.388	NON-ALLERGEN	VAAIFYLI	8	20	27	HLA-B*51:01	4850	VAA-IFYLI	VAAIFYLI	0.386149	0.31
	2	1	1	28	28	KIVNNWLKQLIKVTLVFLFVAAIFYLIT	-0.0028	Probable NON-ANTIGEN	KQL	0.388	NON-ALLERGEN	KQLIKVTL	8	8	15	HLA-B*08:01	3578	KQLIKV-TL	KQLIKVTL	0.240038	0.47
	3	1	1	28	28	KIVNNWLKQLIKVTLVFLFVAAIFYLIT	-0.0028	Probable NON-ANTIGEN	KQL	0.388	NON-ALLERGEN	KVTLVFLF	8	12	19	HLA-A*32:01	2532	KVT-LVFLF	KVTLVFLF	0.089349	0.81
	4	2	35	45	11	KHTDFSSEIIG	1.1009	Probable ANTIGEN	FSS	0.41	ALLERGEN	NA	NA	NA	NA	NA	NA	NA	NA	NA	NA
	5	3	47	59	13	KAIDGGVTRDIAS	0.0954	Probable NON-ANTIGEN	GVTRD	0.434	NON-ALLERGEN	NA	NA	NA	NA	NA	NA	NA	NA	NA	NA
	6	4	61	94	34	DTCFANKHADFDTWFSQRGGSYTNDKACPLIAAV	0.8421	Probable ANTIGEN	ANKHADFDTWFSQRGGSYTNDKACP	0.525	NON-ALLERGEN	FSQRGGSY	8	15	22	HLA-A*01:01	46	FSQRGG-SY	FSQRGGSY	0.155619	0.66
	7	5	97	111	15	REVGFVVPGLPGTIL	0.8981	Probable ANTIGEN	VPGLP	0.428	NON-ALLERGEN	VPGLPGTI	8	7	14	HLA-B*51:01	4895	VP-GLPGTI	VPGLPGTI	0.412242	0.29
	8	5	97	111	15	REVGFVVPGLPGTIL	0.8981	Probable ANTIGEN	VPGLP	0.428	NON-ALLERGEN	VPGLPGTI	8	7	14	HLA-B*07:02	3425	VPGLPG-TI	VPGLPGTI	0.158502	0.82
	9	6	116	127	12	GDFLHFLPRVFS	0.3334	Probable NON-ANTIGEN	HFLP	0.407	ALLERGEN	DFLHFLPR	8	2	9	HLA-A*33:01	2798	DFL-HFLPR	DFLHFLPR	0.443594	0.22
	10	6	116	127	12	GDFLHFLPRVFS	0.3334	Probable NON-ANTIGEN	HFLP	0.407	ALLERGEN	FLHFLPRV	8	3	10	HLA-A*02:03	489	FLH-FLPRV	FLHFLPRV	0.362078	0.4
	11	6	116	127	12	GDFLHFLPRVFS	0.3334	Probable NON-ANTIGEN	HFLP	0.407	ALLERGEN	FLHFLPRV	8	3	10	HLA-A*02:01	279	FLH-FLPRV	FLHFLPRV	0.307134	0.54
	12	6	116	127	12	GDFLHFLPRVFS	0.3334	Probable NON-ANTIGEN	HFLP	0.407	ALLERGEN	FLHFLPRV	8	3	10	HLA-A*02:06	699	FLH-FLPRV	FLHFLPRV	0.182137	0.97
	13	7	129	136	8	VGNICYTP	1.895	Probable ANTIGEN	NA	NA	NON-ALLERGEN	NA	NA	NA	NA	NA	NA	NA	NA	NA	NA
	14	8	138	145	8	KLIEYTDF	1.2404	Probable ANTIGEN	NA	NA	NON-ALLERGEN	NA	NA	NA	NA	NA	NA	NA	NA	NA	NA
	15	9	147	164	18	TSACVLAAECTIFKDASG	-0.1379	Probable NON-ANTIGEN	IFK	0.41	ALLERGEN	NA	NA	NA	NA	NA	NA	NA	NA	NA	NA
	16	10	168	191	24	PYCYDTNVLEGSVAYESLRPDTRY	0.5601	Probable ANTIGEN	TNVLEGSVAYESLRPD	0.5	ALLERGEN	SLRPDTRY	8	17	24	HLA-B*15:01	3881	SLR-PDTRY	SLRPDTRY	0.503472	0.29
	17	10	168	191	24	PYCYDTNVLEGSVAYESLRPDTRY	0.5601	Probable ANTIGEN	TNVLEGSVAYESLRPD	0.5	ALLERGEN	SLRPDTRY	8	17	24	HLA-A*30:02	2201	SLRPDT-RY	SLRPDTRY	0.232612	0.61
	18	10	168	191	24	PYCYDTNVLEGSVAYESLRPDTRY	0.5601	Probable ANTIGEN	TNVLEGSVAYESLRPD	0.5	ALLERGEN	VLEGSVAY	8	8	15	HLA-A*01:01	92	VLE-GSVAY	VLEGSVAY	0.15725	0.65
	19	10	168	191	24	PYCYDTNVLEGSVAYESLRPDTRY	0.5601	Probable ANTIGEN	TNVLEGSVAYESLRPD	0.5	ALLERGEN	VLEGSVAY	8	8	15	HLA-B*15:01	3872	VL-EGSVAY	VLEGSVAY	0.254119	0.75
	20	11	193	203	11	LMDGSIIQFPN	-0.1323	Probable NON-ANTIGEN	NA	NA	NON-ALLERGEN	NA	NA	NA	NA	NA	NA	NA	NA	NA	NA
	21	12	218	230	13	SEYCRHGTCERSE	0.2007	Probable NON-ANTIGEN	RHGTC	0.43	ALLERGEN	NA	NA	NA	NA	NA	NA	NA	NA	NA	NA
	22	13	234	250	17	CVSTSGRWVLNNDYYRS	0.0699	Probable NON-ANTIGEN	RWVLNND	0.445	NON-ALLERGEN	NA	NA	NA	NA	NA	NA	NA	NA	NA	NA
	23	14	253	263	11	GVFCGVDAVNL	0.9314	Probable ANTIGEN	D	0.393	NON-ALLERGEN	NA	NA	NA	NA	NA	NA	NA	NA	NA	NA
	24	15	265	288	24	TNMFTPLIQPIGALDISASIVAGG	0.4067	Probable ANTIGEN	LIQPIGA	0.446	ALLERGEN	QPIGALDI	8	9	16	HLA-B*51:01	4964	QPI-GALDI	QPIGALDI	0.179899	0.78
	25	16	296	306	11	CLAYYFMRFRR	0.3716	Probable NON-ANTIGEN	M	0.387	ALLERGEN	YYFMRFRR	8	4	11	HLA-A*33:01	2876	YYFMR-FRR	YYFMRFRR	0.438412	0.22
	26	16	296	306	11	CLAYYFMRFRR	0.3716	Probable NON-ANTIGEN	M	0.387	ALLERGEN	AYYFMRFR	8	3	10	HLA-A*31:01	2455	AYY-FMRFR	AYYFMRFR	0.31838	0.72
	27	17	387	400	14	TKHFYWFFSNYLKR	0.4155	Probable ANTIGEN	NA	NA	NON-ALLERGEN	NA	NA	NA	NA	NA	NA	NA	NA	NA	NA
	28	18	402	426	25	VVFNGVSFSTFEEAALCTFLLNKEM	0.2287	Probable NON-ANTIGEN	SFSTFEE	0.435	ALLERGEN	EEAALCTF	8	12	19	HLA-B*44:03	4785	EEA-ALCTF	EEAALCTF	0.216859	0.53
	29	18	402	426	25	VVFNGVSFSTFEEAALCTFLLNKEM	0.2287	Probable NON-ANTIGEN	SFSTFEE	0.435	ALLERGEN	EEAALCTF	8	12	19	HLA-B*44:02	4575	EEA-ALCTF	EEAALCTF	0.160202	0.55
	30	18	402	426	25	VVFNGVSFSTFEEAALCTFLLNKEM	0.2287	Probable NON-ANTIGEN	SFSTFEE	0.435	ALLERGEN	VVFNGVSF	8	1	8	HLA-B*15:01	3934	VVF-NGVSF	VVFNGVSF	0.235052	0.82
	31	19	447	491	45	LYNKYKYFSGAMDTTSYREAACCHLAKALNDFSNSGSDVLYQPPQ	0.3389	Probable NON-ANTIGEN	YKYFSGAMDTTS, SNSGSDVLY	0.469	NON-ALLERGEN	LYNKYKYF	8	1	8	HLA-A*24:02	1642	LYNK-YKYF	LYNKYKYF	0.263704	0.39
	32	19	447	491	45	LYNKYKYFSGAMDTTSYREAACCHLAKALNDFSNSGSDVLYQPPQ	0.3389	Probable NON-ANTIGEN	YKYFSGAMDTTS, SNSGSDVLY	0.469	NON-ALLERGEN	LYNKYKYF	8	1	8	HLA-A*23:01	1432	LYNK-YKYF	LYNKYKYF	0.221911	0.39
	33	19	447	491	45	LYNKYKYFSGAMDTTSYREAACCHLAKALNDFSNSGSDVLYQPPQ	0.3389	Probable NON-ANTIGEN	YKYFSGAMDTTS, SNSGSDVLY	0.469	NON-ALLERGEN	GAMDTTSY	8	10	17	HLA-B*35:01	4171	GAMDTT-SY	GAMDTTSY	0.211387	0.59
	34	19	447	491	45	LYNKYKYFSGAMDTTSYREAACCHLAKALNDFSNSGSDVLYQPPQ	0.3389	Probable NON-ANTIGEN	YKYFSGAMDTTS, SNSGSDVLY	0.469	NON-ALLERGEN	NSGSDVLY	8	34	41	HLA-A*01:01	205	NSG-SDVLY	NSGSDVLY	0.144522	0.7
	35	20	493	500	8	SITSAVLQ	0.4264	Probable ANTIGEN	NA	NA	PROBABLE NON-ALLERGEN	NA	NA	NA	NA	NA	NA	NA	NA	NA	NA

## Sheet: NSP5
	S No	General Information					VaxiJen		B cell epitope		Allergenicity	MHC-1
		Seq_no	StartPos	EndPos	Length	Seq	VaxiJen_score	Remarks	B_cell_predicted_sequences	Score	Type	peptide	length	start	end	allele	peptide_index	core	icore	score	percentile
	1	1	1	20	20	SGFRKMAFPSGKVEGCMVQV	-0.0105	Probable NON-ANTIGEN	KMAFPSGKVE	0.447	ALLERGEN	MAFPSGKV	8	6	13	HLA-B*51:01	3594	MAFPSG-KV	MAFPSGKV	0.712026	0.07
	2	1	1	20	20	SGFRKMAFPSGKVEGCMVQV	-0.0105	Probable NON-ANTIGEN	KMAFPSGKVE	0.447	ALLERGEN	SGFRKMAF	8	1	8	HLA-B*08:01	2653	SGF-RKMAF	SGFRKMAF	0.28208	0.38
	3	1	1	20	20	SGFRKMAFPSGKVEGCMVQV	-0.0105	Probable NON-ANTIGEN	KMAFPSGKVE	0.447	ALLERGEN	KMAFPSGK	8	5	12	HLA-A*03:01	629	KMAFP-SGK	KMAFPSGK	0.334495	0.59
	4	2	22	32	11	CGTTTLNGLWL	0.3515	Probable NON-ANTIGEN	NA	NA	NON-ALLERGEN	TTTLNGLW	8	3	10	HLA-B*58:01	4072	TTT-LNGLW	TTTLNGLW	0.402759	0.41
	5	2	22	32	11	CGTTTLNGLWL	0.3515	Probable NON-ANTIGEN	NA	NA	NON-ALLERGEN	TTTLNGLW	8	3	10	HLA-B*57:01	3916	TTT-LNGLW	TTTLNGLW	0.442946	0.62
	6	3	36	74	39	VYCPRHVICTSEDMLNPNYEDLLIRKSNHNFLVQAGNVQ	0.6809	Probable ANTIGEN	CTSEDMLNPNYEDLLIRKS	0.475	NON-ALLERGEN	VYCPRHVI	8	1	8	HLA-A*24:02	1110	VYCPR-HVI	VYCPRHVI	0.184327	0.54
	7	3	36	74	39	VYCPRHVICTSEDMLNPNYEDLLIRKSNHNFLVQAGNVQ	0.6809	Probable ANTIGEN	CTSEDMLNPNYEDLLIRKS	0.475	NON-ALLERGEN	VYCPRHVI	8	1	8	HLA-A*23:01	954	VYCPR-HVI	VYCPRHVI	0.121007	0.68
	8	4	76	89	14	RVIGHSMQNCVLKL	-0.4444	Probable NON-ANTIGEN	SMQNC	0.427	ALLERGEN	NA	NA	NA	NA	NA	NA	NA	NA	NA	NA
	9	5	109	128	20	GQTFSVLACYNGSPSGVYQC	0.0611	Probable NON-ANTIGEN	GSPSG	0.424	ALLERGEN	NA	NA	NA	NA	NA	NA	NA	NA	NA	NA
	10	6	137	158	22	KGSFLNGSCGSVGFNIDYDCVS	1.0982	Probable ANTIGEN	NGSCGSVGFNIDY	0.455	ALLERGEN	NA	NA	NA	NA	NA	NA	NA	NA	NA	NA
	11	7	160	183	24	CYMHHMELPTGVHAGTDLEGNFYG	0.1023	Probable NON-ANTIGEN	P, HAGTDLEGN	0.468	NON-ALLERGEN	TDLEGNFY	8	16	23	HLA-A*01:01	100	NA	TDLEGNFY	0.814096	0.06
	12	8	202	233	32	VNVLAWLYAAVINGDRWFLNRFTTTLNDFNLV	-0.1847	Probable NON-ANTIGEN	W, LNRFTTTLND	0.441	ALLERGEN	AVINGDRW	8	10	17	HLA-B*58:01	4167	AVI-NGDRW	AVINGDRW	0.195893	0.79
	13	8	202	233	32	VNVLAWLYAAVINGDRWFLNRFTTTLNDFNLV	-0.1847	Probable NON-ANTIGEN	W, LNRFTTTLND	0.441	ALLERGEN	LAWLYAAV	8	4	11	HLA-B*51:01	3693	LAW-LYAAV	LAWLYAAV	0.154702	0.9
	14	9	248	259	12	DILGPLSAQTGI	0.5306	Probable ANTIGEN	SA	0.403	NON-ALLERGEN	NA	NA	NA	NA	NA	NA	NA	NA	NA	NA
	15	10	261	278	18	VLDMCASLKELLQNGMNG	0.0209	Probable NON-ANTIGEN	QN	0.414	NON-ALLERGEN	KELLQNGM	8	9	16	HLA-B*40:01	3260	KEL-LQNGM	KELLQNGM	0.108807	0.92
	16	11	286	306	21	LLEDEFTPFDVVRQCSGVTFQ	0.5051	Probable ANTIGEN	EFTPFDVVRQCSG	0.486	ALLERGEN	RQCSGVTF	8	13	20	HLA-B*15:01	2963	RQC-SGVTF	RQCSGVTF	0.366206	0.48

## Sheet: NSP6
	S No	General Information					VaxiJen		B cell epitope		Allergenicity	MHC-1
		Seq_no	StartPos	EndPos	Length	Seq	VaxiJen_score	Remarks	B_cell_predicted_sequences	Score	Type	peptide	length	start	end	allele	peptide_index	core	icore	score	percentile
	1	1	3	10	8	VKRTIKGT	0.8369	Probable ANTIGEN	NA	NA	ALLERGEN	NA	NA	NA	NA	NA	NA	NA	NA	NA	NA
	2	2	12	23	12	HWLLLTILTSLL	0.4003	Probable ANTIGEN	NA	NA	NON-ALLERGEN	NA	NA	NA	NA	NA	NA	NA	NA	NA	NA
	3	3	25	34	10	LVQSTQWSLF	0.8341	Probable ANTIGEN	TQ	0.401	NON-ALLERGEN	NA	NA	NA	NA	NA	NA	NA	NA	NA	NA
	4	4	169	179	11	ISVTSNYSGVV	0.8981	Probable ANTIGEN	SNY	0.407	NON-ALLERGEN	NA	NA	NA	NA	NA	NA	NA	NA	NA	NA
	5	5	200	207	8	FFITGNTL	0.2429	Probable NON-ANTIGEN	NA	NA	NON-ALLERGEN	NA	NA	NA	NA	NA	NA	NA	NA	NA	NA
	6	6	211	220	10	MLVYCFLGYF	-0.0359	Probable NON-ANTIGEN	NA	NA	ALLERGEN	VYCFLGYF	8	3	10	HLA-A*23:01	329	VYCFLGY-F	VYCFLGYF	0.135561	0.6
	7	6	211	220	10	MLVYCFLGYF	-0.0359	Probable NON-ANTIGEN	NA	NA	ALLERGEN	VYCFLGYF	8	3	10	HLA-A*24:02	381	VYCFLGY-F	VYCFLGYF	0.123583	0.75
	8	7	222	231	10	TCYFGLFCLL	0.9672	Probable ANTIGEN	NA	NA	NON-ALLERGEN	NA	NA	NA	NA	NA	NA	NA	NA	NA	NA
	9	8	235	259	25	FRLTLGVYDYLVSTQEFRYMNSQGL	0.723	Probable ANTIGEN	LVSTQEFRYMNS	0.476	ALLERGEN	YLVSTQEF	8	10	17	HLA-A*24:02	394	NA	YLVSTQEF	0.256962	0.39
	10	8	235	259	25	FRLTLGVYDYLVSTQEFRYMNSQGL	0.723	Probable ANTIGEN	LVSTQEFRYMNS	0.476	ALLERGEN	YLVSTQEF	8	10	17	HLA-A*23:01	342	NA	YLVSTQEF	0.191693	0.44
	11	8	235	259	25	FRLTLGVYDYLVSTQEFRYMNSQGL	0.723	Probable ANTIGEN	LVSTQEFRYMNS	0.476	ALLERGEN	YLVSTQEF	8	10	17	HLA-B*15:01	966	YLV-STQEF	YLVSTQEF	0.292013	0.65
	12	8	235	259	25	FRLTLGVYDYLVSTQEFRYMNSQGL	0.723	Probable ANTIGEN	LVSTQEFRYMNS	0.476	ALLERGEN	VSTQEFRY	8	12	19	HLA-A*01:01	32	VST-QEFRY	VSTQEFRY	0.093805	0.98
	13	8	235	259	25	FRLTLGVYDYLVSTQEFRYMNSQGL	0.723	Probable ANTIGEN	LVSTQEFRYMNS	0.476	ALLERGEN	RYMNSQGL	8	18	25	HLA-A*24:02	402	RYM-NSQGL	RYMNSQGL	0.07934	0.98
	14	9	261	290	30	LLEDEFTPFDVVRQCSGVTFQ	0.5051	Probable ANTIGEN	EFTPFDVVRQCSG	0.486	ALLERGEN	RQCSGVTF	8	13	20	HLA-B*15:01	987	RQC-SGVTF	RQCSGVTF	0.366206	0.48

## Sheet: NSP8
	S No	General Information				VaxiJen		B cell		Allergenicity	MHC-1 prediction
		StartPos	EndPos	Length	Seq	VaxiJen_score	Remarks	B_cell_predicted_sequences	Score	Type	MHC-1 prediction
	1	110	117	8	ARDGCVPL	1.1729	Probable ANTIGEN	nil	nil	ALLERGEN	NA

## Sheet: NSP12
	S No	General Information					VaxiJen		B cell epitope		Allergenicity	MHC-1
		Seq_no	StartPos	EndPos	Length	Seq	VaxiJen_score	Remarks	B_cell_predicted_sequences	Score	Type	peptide	length	start	end	allele	peptide_index	core	icore	score	percentile
	1	1	10	25	16	RVCGVSAARLTPCGTG	0.5916	Probable ANTIGEN	AARLTP	0.433	PROBABLE ALLERGEN	NA	NA	NA	NA	NA	NA	NA	NA	NA	NA
	2	2	27	59	33	STDVVYRAFDIYNDKVAGFAKFLKTNCCRFQEK	0.3083	Probable NON-ANTIGEN	RAFDIYNDK, TNCCR	0.465	PROBABLE ALLERGEN	KVAGFAKF	8	15	22	HLA-A*32:01	7524	KVA-GFAKF	KVAGFAKF	0.113803	0.66
	3	3	61	90	30	EDDNLIDSYFVVKRHTFSNYQHEETIYNLL	0.2769	Probable NON-ANTIGEN	RHTFSNYQHEETI	0.477	PROBABLE ALLERGEN	FVVKRHTF	8	10	17	HLA-B*08:01	10670	FV-VKRHTF	FVVKRHTF	0.568479	0.11
	4	3	61	90	30	EDDNLIDSYFVVKRHTFSNYQHEETIYNLL	0.2769	Probable NON-ANTIGEN	RHTFSNYQHEETI	0.477	PROBABLE ALLERGEN	YQHEETIY	8	20	27	HLA-B*15:01	11305	YQHEETI-Y	YQHEETIY	0.703209	0.13
	5	3	61	90	30	EDDNLIDSYFVVKRHTFSNYQHEETIYNLL	0.2769	Probable NON-ANTIGEN	RHTFSNYQHEETI	0.477	PROBABLE ALLERGEN	DSYFVVKR	8	7	14	HLA-A*33:01	8167	DSY-FVVKR	DSYFVVKR	0.524414	0.15
	6	3	61	90	30	EDDNLIDSYFVVKRHTFSNYQHEETIYNLL	0.2769	Probable NON-ANTIGEN	RHTFSNYQHEETI	0.477	PROBABLE ALLERGEN	HEETIYNL	8	22	29	HLA-B*40:01	12557	HE-ETIYNL	HEETIYNL	0.539624	0.25
	7	3	61	90	30	EDDNLIDSYFVVKRHTFSNYQHEETIYNLL	0.2769	Probable NON-ANTIGEN	RHTFSNYQHEETI	0.477	PROBABLE ALLERGEN	DSYFVVKR	8	7	14	HLA-A*68:01	8792	DSY-FVVKR	DSYFVVKR	0.427473	0.79
	8	4	96	123	28	VAKHDFFKFRIDGDMVPHISRQRLTKYT	-0.2619	Probable NON-ANTIGEN	FFKFRIDGDMVPHISRQRL	0.492	PROBABLE NON-ALLERGEN	DMVPHISR	8	14	21	HLA-A*33:01	8197	DMVPHI-SR	DMVPHISR	0.469097	0.19
	9	4	96	123	28	VAKHDFFKFRIDGDMVPHISRQRLTKYT	-0.2619	Probable NON-ANTIGEN	FFKFRIDGDMVPHISRQRL	0.492	PROBABLE NON-ALLERGEN	DGDMVPHI	8	12	19	HLA-B*51:01	14445	DG-DMVPHI	DGDMVPHI	0.415802	0.28
	10	4	96	123	28	VAKHDFFKFRIDGDMVPHISRQRLTKYT	-0.2619	Probable NON-ANTIGEN	FFKFRIDGDMVPHISRQRL	0.492	PROBABLE NON-ALLERGEN	ISRQRLTK	8	19	26	HLA-A*30:01	5702	ISRQ-RLTK	ISRQRLTK	0.202345	0.75
	11	4	96	123	28	VAKHDFFKFRIDGDMVPHISRQRLTKYT	-0.2619	Probable NON-ANTIGEN	FFKFRIDGDMVPHISRQRL	0.492	PROBABLE NON-ALLERGEN	PHISRQRL	8	17	24	HLA-B*07:02	10075	NA	PHISRQRL	0.154858	0.83
	12	5	125	152	28	ADLVYALRHFDEGNCDTLKEILVTYNCC	0.2286	Probable NON-ANTIGEN	RHFDEGNCD	0.433	PROBABLE ALLERGEN	LKEILVTY	8	18	25	HLA-B*15:01	11347	NA	LKEILVTY	0.29574	0.65
	13	5	125	152	28	ADLVYALRHFDEGNCDTLKEILVTYNCC	0.2286	Probable NON-ANTIGEN	RHFDEGNCD	0.433	PROBABLE ALLERGEN	DTLKEILV	8	16	23	HLA-B*51:01	14470	DTLKEIL-V	DTLKEILV	0.187291	0.74
	14	6	154	170	17	DDYFNKKDWYDFVENPD	0.6434	Probable ANTIGEN	NKKDWYDF	0.452	PROBABLE ALLERGEN	NA	NA	NA	NA	NA	NA	NA	NA	NA	NA
	15	7	172	180	9	LRVYANLGE	0.0967	Probable NON-ANTIGEN	NA	NA	PROBABLE ALLERGEN	NA	NA	NA	NA	NA	NA	NA	NA	NA	NA
	16	8	186	226	41	LLKTVQFCDAMRNAGIVGVLTLDNQDLNGNWYDFGDFIQTT	0.8265	Probable ANTIGEN	NQDLNGNWYDFGDF	0.465	PROBABLE NON-ALLERGEN	DAMRNAGI	8	9	16	HLA-B*51:01	14496	DAM-RNAGI	DAMRNAGI	0.454196	0.23
	17	9	228	248	21	GSGVPVVDSYYSLLMPILTLT	0.5857	Probable ANTIGEN	D	0.396	PROBABLE ALLERGEN	VPVVDSYY	8	4	11	HLA-B*35:01	12025	VPV-VDSYY	VPVVDSYY	0.507064	0.23
	18	9	228	248	21	GSGVPVVDSYYSLLMPILTLT	0.5857	Probable ANTIGEN	D	0.396	PROBABLE ALLERGEN	LLMPILTL	8	13	20	HLA-A*02:01	784	LLMP-ILTL	LLMPILTL	0.381937	0.39
	19	9	228	248	21	GSGVPVVDSYYSLLMPILTLT	0.5857	Probable ANTIGEN	D	0.396	PROBABLE ALLERGEN	VPVVDSYY	8	4	11	HLA-B*53:01	15150	VPV-VDSYY	VPVVDSYY	0.167402	0.5
	20	9	228	248	21	GSGVPVVDSYYSLLMPILTLT	0.5857	Probable ANTIGEN	D	0.396	PROBABLE ALLERGEN	DSYYSLLM	8	8	15	HLA-B*51:01	14529	DSY-YSLLM	DSYYSLLM	0.253431	0.57
	21	9	228	248	21	GSGVPVVDSYYSLLMPILTLT	0.5857	Probable ANTIGEN	D	0.396	PROBABLE ALLERGEN	LLMPILTL	8	13	20	HLA-B*08:01	10784	LLMPIL-TL	LLMPILTL	0.198136	0.6
	22	9	228	248	21	GSGVPVVDSYYSLLMPILTLT	0.5857	Probable ANTIGEN	D	0.396	PROBABLE ALLERGEN	LLMPILTL	8	13	20	HLA-A*02:03	1409	LLMP-ILTL	LLMPILTL	0.183206	0.88
	23	9	228	248	21	GSGVPVVDSYYSLLMPILTLT	0.5857	Probable ANTIGEN	D	0.396	PROBABLE ALLERGEN	LLMPILTL	8	13	20	HLA-A*02:06	2034	LLMP-ILTL	LLMPILTL	0.189409	0.93
	24	10	258	272	15	DTDLTKPYIKWDLLK	-0.2651	Probable NON-ANTIGEN	KPYIKW	0.437	PROBABLE NON-ALLERGEN	LTKPYIKW	8	4	11	HLA-B*57:01	15789	LTKPYI-KW	LTKPYIKW	0.954665	0.06
	25	10	258	272	15	DTDLTKPYIKWDLLK	-0.2651	Probable NON-ANTIGEN	KPYIKW	0.437	PROBABLE NON-ALLERGEN	LTKPYIKW	8	4	11	HLA-B*58:01	16414	LT-KPYIKW	LTKPYIKW	0.748471	0.15
	26	10	258	272	15	DTDLTKPYIKWDLLK	-0.2651	Probable NON-ANTIGEN	KPYIKW	0.437	PROBABLE NON-ALLERGEN	DTDLTKPY	8	1	8	HLA-A*01:01	161	DTDLTKP-Y	DTDLTKPY	0.426819	0.25
	27	10	258	272	15	DTDLTKPYIKWDLLK	-0.2651	Probable NON-ANTIGEN	KPYIKW	0.437	PROBABLE NON-ALLERGEN	KPYIKWDL	8	6	13	HLA-B*08:01	10791	KPYIK-WDL	KPYIKWDL	0.357744	0.28
	28	10	258	272	15	DTDLTKPYIKWDLLK	-0.2651	Probable NON-ANTIGEN	KPYIKW	0.437	PROBABLE NON-ALLERGEN	KPYIKWDL	8	6	13	HLA-B*07:02	10166	KPY-IKWDL	KPYIKWDL	0.311077	0.46
	29	10	258	272	15	DTDLTKPYIKWDLLK	-0.2651	Probable NON-ANTIGEN	KPYIKW	0.437	PROBABLE NON-ALLERGEN	DTDLTKPY	8	1	8	HLA-A*26:01	5161	DT-DLTKPY	DTDLTKPY	0.082401	0.82
	30	10	258	272	15	DTDLTKPYIKWDLLK	-0.2651	Probable NON-ANTIGEN	KPYIKW	0.437	PROBABLE NON-ALLERGEN	LTKPYIKW	8	4	11	HLA-A*32:01	7664	LTK-PYIKW	LTKPYIKW	0.085705	0.84
	31	10	258	272	15	DTDLTKPYIKWDLLK	-0.2651	Probable NON-ANTIGEN	KPYIKW	0.437	PROBABLE NON-ALLERGEN	PYIKWDLL	8	7	14	HLA-A*24:02	4542	PYI-KWDLL	PYIKWDLL	0.100302	0.85
	32	10	258	272	15	DTDLTKPYIKWDLLK	-0.2651	Probable NON-ANTIGEN	KPYIKW	0.437	PROBABLE NON-ALLERGEN	PYIKWDLL	8	7	14	HLA-A*23:01	3917	PYI-KWDLL	PYIKWDLL	0.077811	0.95
	33	11	274	292	19	DFTEERLKLFDRYFKYWDQ	0.449	Probable ANTIGEN	LKL, R, K	0.442	PROBABLE ALLERGEN	KLFDRYFK	8	8	15	HLA-A*03:01	2676	KLFDR-YFK	KLFDRYFK	0.566046	0.27
	34	11	274	292	19	DFTEERLKLFDRYFKYWDQ	0.449	Probable ANTIGEN	LKL, R, K	0.442	PROBABLE ALLERGEN	TEERLKLF	8	3	10	HLA-B*44:02	13296	TE-ERLKLF	TEERLKLF	0.257325	0.4
	35	11	274	292	19	DFTEERLKLFDRYFKYWDQ	0.449	Probable ANTIGEN	LKL, R, K	0.442	PROBABLE ALLERGEN	TEERLKLF	8	3	10	HLA-B*44:03	13921	TE-ERLKLF	TEERLKLF	0.24711	0.47
	36	11	274	292	19	DFTEERLKLFDRYFKYWDQ	0.449	Probable ANTIGEN	LKL, R, K	0.442	PROBABLE ALLERGEN	RLKLFDRY	8	6	13	HLA-B*15:01	11424	RLK-LFDRY	RLKLFDRY	0.332457	0.55
	37	11	274	292	19	DFTEERLKLFDRYFKYWDQ	0.449	Probable ANTIGEN	LKL, R, K	0.442	PROBABLE ALLERGEN	RLKLFDRY	8	6	13	HLA-A*30:02	6424	RLK-LFDRY	RLKLFDRY	0.230336	0.61
	38	11	274	292	19	DFTEERLKLFDRYFKYWDQ	0.449	Probable ANTIGEN	LKL, R, K	0.442	PROBABLE ALLERGEN	KLFDRYFK	8	8	15	HLA-A*30:01	5801	KLFD-RYFK	KLFDRYFK	0.201409	0.76
	39	12	294	322	29	YHPNCVNCLDDRCILHCANFNVLFSTVFP	0.7101	Probable ANTIGEN	NCLD, F	0.437	PROBABLE NON-ALLERGEN	HPNCVNCL	8	2	9	HLA-B*07:02	10182	HPN-CVNCL	HPNCVNCL	0.124396	0.96
	40	13	324	356	33	TSFGPLVRKIFVDGVPFVVSTGYHFRELGVVHN	0.8234	Probable ANTIGEN	HFRELG	0.431	PROBABLE ALLERGEN	FVDGVPFV	8	11	18	HLA-A*02:06	2088	FV-DGVPFV	FVDGVPFV	0.462556	0.3
	41	13	324	356	33	TSFGPLVRKIFVDGVPFVVSTGYHFRELGVVHN	0.8234	Probable ANTIGEN	HFRELG	0.431	PROBABLE ALLERGEN	FVDGVPFV	8	11	18	HLA-A*02:01	838	FV-DGVPFV	FVDGVPFV	0.280329	0.58
	42	13	324	356	33	TSFGPLVRKIFVDGVPFVVSTGYHFRELGVVHN	0.8234	Probable ANTIGEN	HFRELG	0.431	PROBABLE ALLERGEN	TSFGPLVR	8	1	8	HLA-A*68:01	8953	TSFGPLV-R	TSFGPLVR	0.472424	0.69
	43	13	324	356	33	TSFGPLVRKIFVDGVPFVVSTGYHFRELGVVHN	0.8234	Probable ANTIGEN	HFRELG	0.431	PROBABLE ALLERGEN	FGPLVRKI	8	3	10	HLA-B*51:01	14580	FG-PLVRKI	FGPLVRKI	0.196288	0.71
	44	13	324	356	33	TSFGPLVRKIFVDGVPFVVSTGYHFRELGVVHN	0.8234	Probable ANTIGEN	HFRELG	0.431	PROBABLE ALLERGEN	GPLVRKIF	8	4	11	HLA-B*08:01	10831	GPLVRKI-F	GPLVRKIF	0.164565	0.71
	45	13	324	356	33	TSFGPLVRKIFVDGVPFVVSTGYHFRELGVVHN	0.8234	Probable ANTIGEN	HFRELG	0.431	PROBABLE ALLERGEN	PFVVSTGY	8	16	23	HLA-B*35:01	12093	NA	PFVVSTGY	0.149827	0.77
	46	13	324	356	33	TSFGPLVRKIFVDGVPFVVSTGYHFRELGVVHN	0.8234	Probable ANTIGEN	HFRELG	0.431	PROBABLE ALLERGEN	IFVDGVPF	8	10	17	HLA-A*23:01	3962	IFVDGVP-F	IFVDGVPF	0.098058	0.82
	47	13	324	356	33	TSFGPLVRKIFVDGVPFVVSTGYHFRELGVVHN	0.8234	Probable ANTIGEN	HFRELG	0.431	PROBABLE ALLERGEN	TGYHFREL	8	21	28	HLA-B*08:01	10848	TGY-HFREL	TGYHFREL	0.136445	0.86
	48	13	324	356	33	TSFGPLVRKIFVDGVPFVVSTGYHFRELGVVHN	0.8234	Probable ANTIGEN	HFRELG	0.431	PROBABLE ALLERGEN	TSFGPLVR	8	1	8	HLA-A*33:01	8328	TSFGPLV-R	TSFGPLVR	0.153021	0.93
	49	13	324	356	33	TSFGPLVRKIFVDGVPFVVSTGYHFRELGVVHN	0.8234	Probable ANTIGEN	HFRELG	0.431	PROBABLE ALLERGEN	GPLVRKIF	8	4	11	HLA-B*07:02	10206	GPL-VRKIF	GPLVRKIF	0.13081	0.93
	50	13	324	356	33	TSFGPLVRKIFVDGVPFVVSTGYHFRELGVVHN	0.8234	Probable ANTIGEN	HFRELG	0.431	PROBABLE ALLERGEN	IFVDGVPF	8	10	17	HLA-A*24:02	4587	IFVDGVP-F	IFVDGVPF	0.082359	0.95
	51	14	360	379	20	NLHSSRLSFKELLVYAADPA	0.5255	Probable ANTIGEN	RLSFK	0.434	PROBABLE ALLERGEN	SFKELLVY	8	8	15	HLA-A*30:02	6486	SFKEL-LVY	SFKELLVY	0.197871	0.72
	52	15	383	399	17	ASGNLLLDKRTTCFSVA	0.9978	Probable ANTIGEN	LLDKRTTC	0.444	PROBABLE ALLERGEN	NA	NA	NA	NA	NA	NA	NA	NA	NA	NA
	53	16	401	462	62	LTNNVAFQTVKPGNFNKDFYDFAVSKGFFKEGSSVELKHFFFAQDGNAAISDYDYYRYNLPT	0.5337	Probable ANTIGEN	FQTVKPGNFNKD, KGFFKEGSSV, GNAAISDYDYYRY	0.493	PROBABLE NON-ALLERGEN	KEGSSVEL	8	30	37	HLA-B*40:01	12781	KE-GSSVEL	KEGSSVEL	0.565745	0.23
	54	16	401	462	62	LTNNVAFQTVKPGNFNKDFYDFAVSKGFFKEGSSVELKHFFFAQDGNAAISDYDYYRYNLPT	0.5337	Probable ANTIGEN	FQTVKPGNFNKD, KGFFKEGSSV, GNAAISDYDYYRY	0.493	PROBABLE NON-ALLERGEN	SDYDYYRY	8	51	58	HLA-A*01:01	302	NA	SDYDYYRY	0.421528	0.25
	55	16	401	462	62	LTNNVAFQTVKPGNFNKDFYDFAVSKGFFKEGSSVELKHFFFAQDGNAAISDYDYYRYNLPT	0.5337	Probable ANTIGEN	FQTVKPGNFNKD, KGFFKEGSSV, GNAAISDYDYYRY	0.493	PROBABLE NON-ALLERGEN	AVSKGFFK	8	23	30	HLA-A*11:01	3399	AVSKG-FFK	AVSKGFFK	0.305654	0.59
	56	16	401	462	62	LTNNVAFQTVKPGNFNKDFYDFAVSKGFFKEGSSVELKHFFFAQDGNAAISDYDYYRYNLPT	0.5337	Probable ANTIGEN	FQTVKPGNFNKD, KGFFKEGSSV, GNAAISDYDYYRY	0.493	PROBABLE NON-ALLERGEN	AVSKGFFK	8	23	30	HLA-A*03:01	2774	AVS-KGFFK	AVSKGFFK	0.198693	0.94
	57	16	401	462	62	LTNNVAFQTVKPGNFNKDFYDFAVSKGFFKEGSSVELKHFFFAQDGNAAISDYDYYRYNLPT	0.5337	Probable ANTIGEN	FQTVKPGNFNKD, KGFFKEGSSV, GNAAISDYDYYRY	0.493	PROBABLE NON-ALLERGEN	VELKHFFF	8	35	42	HLA-B*44:03	14036	VELKH-FFF	VELKHFFF	0.073083	0.99
	58	17	464	486	23	CDIRQLLFVVEVVDKYFDCYDGG	0.6044	Probable ANTIGEN	FDC	0.42	PROBABLE NON-ALLERGEN	VVEVVDKY	8	9	16	HLA-A*01:01	315	VVE-VVDKY	VVEVVDKY	0.19632	0.55
	59	17	464	486	23	CDIRQLLFVVEVVDKYFDCYDGG	0.6044	Probable ANTIGEN	FDC	0.42	PROBABLE NON-ALLERGEN	VEVVDKYF	8	10	17	HLA-B*44:03	14066	VEV-VDKYF	VEVVDKYF	0.146933	0.67
	60	17	464	486	23	CDIRQLLFVVEVVDKYFDCYDGG	0.6044	Probable ANTIGEN	FDC	0.42	PROBABLE NON-ALLERGEN	VEVVDKYF	8	10	17	HLA-B*44:02	13441	VEV-VDKYF	VEVVDKYF	0.084758	0.79
	61	18	490	520	31	ANQVIVNNLDKSAGFPFNKWGKARLYYDSMS	-0.0456	Probable NON-ANTIGEN	NNLDKSAGFPFNKWGKARLYY	0.499	PROBABLE ALLERGEN	AGFPFNKW	8	13	20	HLA-B*58:01	16585	AGFPF-NKW	AGFPFNKW	0.382384	0.42
	62	18	490	520	31	ANQVIVNNLDKSAGFPFNKWGKARLYYDSMS	-0.0456	Probable NON-ANTIGEN	NNLDKSAGFPFNKWGKARLYY	0.499	PROBABLE ALLERGEN	AGFPFNKW	8	13	20	HLA-B*57:01	15960	AGFPF-NKW	AGFPFNKW	0.49428	0.54
	63	18	490	520	31	ANQVIVNNLDKSAGFPFNKWGKARLYYDSMS	-0.0456	Probable NON-ANTIGEN	NNLDKSAGFPFNKWGKARLYY	0.499	PROBABLE ALLERGEN	KWGKARLY	8	19	26	HLA-A*30:02	6591	K-WGKARLY	KWGKARLY	0.180252	0.79
	64	19	530	612	83	YTKRNVIPTITQMNLKYAISAKNRARTVAGVSICSTMTNRQFHQKLLKSIAATRGATVVIGTSKFYGGWHNMLKTVYSDVENP	0.4801	Probable ANTIGEN	IPTITQMNLKYAISAKNRART, RQFHQKL, YGG	0.468	PROBABLE ALLERGEN	QMNLKYAI	8	12	19	HLA-B*08:01	10983	QMNLK-YAI	QMNLKYAI	0.330559	0.31
	65	19	530	612	83	YTKRNVIPTITQMNLKYAISAKNRARTVAGVSICSTMTNRQFHQKLLKSIAATRGATVVIGTSKFYGGWHNMLKTVYSDVENP	0.4801	Probable ANTIGEN	IPTITQMNLKYAISAKNRART, RQFHQKL, YGG	0.468	PROBABLE ALLERGEN	ITQMNLKY	8	10	17	HLA-A*01:01	356	ITQ-MNLKY	ITQMNLKY	0.293835	0.38
	66	19	530	612	83	YTKRNVIPTITQMNLKYAISAKNRARTVAGVSICSTMTNRQFHQKLLKSIAATRGATVVIGTSKFYGGWHNMLKTVYSDVENP	0.4801	Probable ANTIGEN	IPTITQMNLKYAISAKNRART, RQFHQKL, YGG	0.468	PROBABLE ALLERGEN	HQKLLKSI	8	43	50	HLA-B*08:01	11014	HQKLLK-SI	HQKLLKSI	0.184374	0.64
	67	19	530	612	83	YTKRNVIPTITQMNLKYAISAKNRARTVAGVSICSTMTNRQFHQKLLKSIAATRGATVVIGTSKFYGGWHNMLKTVYSDVENP	0.4801	Probable ANTIGEN	IPTITQMNLKYAISAKNRART, RQFHQKL, YGG	0.468	PROBABLE ALLERGEN	FYGGWHNM	8	65	72	HLA-A*24:02	4786	FY-GGWHNM	FYGGWHNM	0.111398	0.8
	68	19	530	612	83	YTKRNVIPTITQMNLKYAISAKNRARTVAGVSICSTMTNRQFHQKLLKSIAATRGATVVIGTSKFYGGWHNMLKTVYSDVENP	0.4801	Probable ANTIGEN	IPTITQMNLKYAISAKNRART, RQFHQKL, YGG	0.468	PROBABLE ALLERGEN	ITQMNLKY	8	10	17	HLA-A*30:02	6606	ITQ-MNLKY	ITQMNLKY	0.1707	0.83
	69	20	614	628	15	LMGWDYPKCDRAMPN	-0.3398	Probable NON-ANTIGEN	PKCDR	0.434	PROBABLE ALLERGEN	YPKCDRAM	8	6	13	HLA-B*07:02	10428	YPK-CDRAM	YPKCDRAM	0.315448	0.45
	70	20	614	628	15	LMGWDYPKCDRAMPN	-0.3398	Probable NON-ANTIGEN	PKCDR	0.434	PROBABLE ALLERGEN	YPKCDRAM	8	6	13	HLA-B*08:01	11053	YPKCDR-AM	YPKCDRAM	0.173039	0.68
	71	20	614	628	15	LMGWDYPKCDRAMPN	-0.3398	Probable NON-ANTIGEN	PKCDR	0.434	PROBABLE ALLERGEN	YPKCDRAM	8	6	13	HLA-B*35:01	12303	YPK-CDRAM	YPKCDRAM	0.140164	0.83
	72	21	630	642	13	LRIMASLVLARKH	0.7865	Probable ANTIGEN	NA	NA	PROBABLE ALLERGEN	NA	NA	NA	NA	NA	NA	NA	NA	NA	NA
	73	22	648	655	8	LSHRFYRL	0.4114	Probable ANTIGEN	NA	NA	PROBABLE ALLERGEN	LSHRFYRL	8	1	8	HLA-B*08:01	11062	LSH-RFYRL	LSHRFYRL	0.124386	0.94
	74	23	657	670	14	NECAQVLSEMVMCG	-0.2164	Probable NON-ANTIGEN	NA	NA	PROBABLE ALLERGEN	NA	NA	NA	NA	NA	NA	NA	NA	NA	NA
	75	24	672	693	22	SLYVKPGGTSSGDATTAYANSV	0.5697	Probable ANTIGEN	KPGGTSSGDATTAY	0.522	PROBABLE NON-ALLERGEN	SGDATTAY	8	11	18	HLA-A*01:01	455	SGD-ATTAY	SGDATTAY	0.134688	0.75
	76	25	695	716	22	NICQAVTANVNALLSTDGNKIA	-0.0654	Probable NON-ANTIGEN	NALLSTDGN	0.454	PROBABLE NON-ALLERGEN	NA	NA	NA	NA	NA	NA	NA	NA	NA	NA
	77	26	720	738	19	VRNLQHRLYECLYRNRDVD	0.4299	Probable ANTIGEN	HRLYE, LYRN	0.45	PROBABLE NON-ALLERGEN	RLYECLYR	8	7	14	HLA-A*31:01	7356	RLYECL-YR	RLYECLYR	0.284646	0.82
	78	27	745	755	11	FYAYLRKHFSM	0.3722	Probable NON-ANTIGEN	LRK	0.407	PROBABLE ALLERGEN	YLRKHFSM	8	4	11	HLA-B*08:01	11115	YLR-KHFSM	YLRKHFSM	0.928401	0.01
	79	27	745	755	11	FYAYLRKHFSM	0.3722	Probable NON-ANTIGEN	LRK	0.407	PROBABLE ALLERGEN	YAYLRKHF	8	2	9	HLA-B*08:01	11113	YAYLRKH-F	YAYLRKHF	0.657807	0.08
	80	27	745	755	11	FYAYLRKHFSM	0.3722	Probable NON-ANTIGEN	LRK	0.407	PROBABLE ALLERGEN	YAYLRKHF	8	2	9	HLA-B*51:01	14863	YAY-LRKHF	YAYLRKHF	0.192346	0.72
	81	28	757	775	19	ILSDDAVVCFNSTYASQGL	0.6837	Probable ANTIGEN	TYA	0.425	PROBABLE ALLERGEN	NA	NA	NA	NA	NA	NA	NA	NA	NA	NA
	82	29	781	805	25	NFKSVLYYQNNVFMSEAKCWTETDL	0.6616	Probable ANTIGEN	LYYQNNVFM, CWT	0.455	PROBABLE ALLERGEN	LYYQNNVF	8	6	13	HLA-A*23:01	4258	LYYQN-NVF	LYYQNNVF	0.337678	0.26
	83	29	781	805	25	NFKSVLYYQNNVFMSEAKCWTETDL	0.6616	Probable ANTIGEN	LYYQNNVFM, CWT	0.455	PROBABLE ALLERGEN	LYYQNNVF	8	6	13	HLA-A*24:02	4883	LYYQN-NVF	LYYQNNVF	0.354232	0.3
	84	29	781	805	25	NFKSVLYYQNNVFMSEAKCWTETDL	0.6616	Probable ANTIGEN	LYYQNNVFM, CWT	0.455	PROBABLE ALLERGEN	YYQNNVFM	8	7	14	HLA-A*24:02	4884	YYQNNVF-M	YYQNNVFM	0.092138	0.9
	85	30	811	821	11	EFCSQHTMLVK	0.3807	Probable NON-ANTIGEN	QHT	0.404	PROBABLE ALLERGEN	NA	NA	NA	NA	NA	NA	NA	NA	NA	NA
	86	31	825	932	108	DYVYLPYPDPSRILGAGCFVDDIVKTDGTLMIERFVSLAIDAYPLTKHPNQEYADVFHLYLQYIRKLHDELTGHMLDMYSVMLTNDNTSRYWEPEFYEAMYTPHTVLQ	0.215	Probable NON-ANTIGEN	PYPDP, VKT, LTKHPNQEYA, DNTSRYWEPE, AMYTPH	0.454	PROBABLE NON-ALLERGEN	YADVFHLY	8	53	60	HLA-A*01:01	577	YAD-VFHLY	YADVFHLY	0.920506	0.03
	87	31	825	932	108	DYVYLPYPDPSRILGAGCFVDDIVKTDGTLMIERFVSLAIDAYPLTKHPNQEYADVFHLYLQYIRKLHDELTGHMLDMYSVMLTNDNTSRYWEPEFYEAMYTPHTVLQ	0.215	Probable NON-ANTIGEN	PYPDP, VKT, LTKHPNQEYA, DNTSRYWEPE, AMYTPH	0.454	PROBABLE NON-ALLERGEN	MIERFVSL	8	31	38	HLA-B*08:01	11180	MI-ERFVSL	MIERFVSL	0.782545	0.04
	88	31	825	932	108	DYVYLPYPDPSRILGAGCFVDDIVKTDGTLMIERFVSLAIDAYPLTKHPNQEYADVFHLYLQYIRKLHDELTGHMLDMYSVMLTNDNTSRYWEPEFYEAMYTPHTVLQ	0.215	Probable NON-ANTIGEN	PYPDP, VKT, LTKHPNQEYA, DNTSRYWEPE, AMYTPH	0.454	PROBABLE NON-ALLERGEN	YPDPSRIL	8	7	14	HLA-B*07:02	10531	YPDPSRI-L	YPDPSRIL	0.846491	0.07
	89	31	825	932	108	DYVYLPYPDPSRILGAGCFVDDIVKTDGTLMIERFVSLAIDAYPLTKHPNQEYADVFHLYLQYIRKLHDELTGHMLDMYSVMLTNDNTSRYWEPEFYEAMYTPHTVLQ	0.215	Probable NON-ANTIGEN	PYPDP, VKT, LTKHPNQEYA, DNTSRYWEPE, AMYTPH	0.454	PROBABLE NON-ALLERGEN	YADVFHLY	8	53	60	HLA-B*35:01	12452	YAD-VFHLY	YADVFHLY	0.685583	0.13
	90	31	825	932	108	DYVYLPYPDPSRILGAGCFVDDIVKTDGTLMIERFVSLAIDAYPLTKHPNQEYADVFHLYLQYIRKLHDELTGHMLDMYSVMLTNDNTSRYWEPEFYEAMYTPHTVLQ	0.215	Probable NON-ANTIGEN	PYPDP, VKT, LTKHPNQEYA, DNTSRYWEPE, AMYTPH	0.454	PROBABLE NON-ALLERGEN	YPDPSRIL	8	7	14	HLA-B*51:01	14906	YPDPS-RIL	YPDPSRIL	0.588056	0.13
	91	31	825	932	108	DYVYLPYPDPSRILGAGCFVDDIVKTDGTLMIERFVSLAIDAYPLTKHPNQEYADVFHLYLQYIRKLHDELTGHMLDMYSVMLTNDNTSRYWEPEFYEAMYTPHTVLQ	0.215	Probable NON-ANTIGEN	PYPDP, VKT, LTKHPNQEYA, DNTSRYWEPE, AMYTPH	0.454	PROBABLE NON-ALLERGEN	YPDPSRIL	8	7	14	HLA-B*08:01	11156	YPDPSRI-L	YPDPSRIL	0.435356	0.2
	92	31	825	932	108	DYVYLPYPDPSRILGAGCFVDDIVKTDGTLMIERFVSLAIDAYPLTKHPNQEYADVFHLYLQYIRKLHDELTGHMLDMYSVMLTNDNTSRYWEPEFYEAMYTPHTVLQ	0.215	Probable NON-ANTIGEN	PYPDP, VKT, LTKHPNQEYA, DNTSRYWEPE, AMYTPH	0.454	PROBABLE NON-ALLERGEN	YPDPSRIL	8	7	14	HLA-B*35:01	12406	YPDPSRI-L	YPDPSRIL	0.507391	0.23
	93	31	825	932	108	DYVYLPYPDPSRILGAGCFVDDIVKTDGTLMIERFVSLAIDAYPLTKHPNQEYADVFHLYLQYIRKLHDELTGHMLDMYSVMLTNDNTSRYWEPEFYEAMYTPHTVLQ	0.215	Probable NON-ANTIGEN	PYPDP, VKT, LTKHPNQEYA, DNTSRYWEPE, AMYTPH	0.454	PROBABLE NON-ALLERGEN	PYPDPSRI	8	6	13	HLA-B*51:01	14905	NA	PYPDPSRI	0.462242	0.23
	94	31	825	932	108	DYVYLPYPDPSRILGAGCFVDDIVKTDGTLMIERFVSLAIDAYPLTKHPNQEYADVFHLYLQYIRKLHDELTGHMLDMYSVMLTNDNTSRYWEPEFYEAMYTPHTVLQ	0.215	Probable NON-ANTIGEN	PYPDP, VKT, LTKHPNQEYA, DNTSRYWEPE, AMYTPH	0.454	PROBABLE NON-ALLERGEN	YPDPSRIL	8	7	14	HLA-B*53:01	15531	YPDPS-RIL	YPDPSRIL	0.312073	0.28
	95	31	825	932	108	DYVYLPYPDPSRILGAGCFVDDIVKTDGTLMIERFVSLAIDAYPLTKHPNQEYADVFHLYLQYIRKLHDELTGHMLDMYSVMLTNDNTSRYWEPEFYEAMYTPHTVLQ	0.215	Probable NON-ANTIGEN	PYPDP, VKT, LTKHPNQEYA, DNTSRYWEPE, AMYTPH	0.454	PROBABLE NON-ALLERGEN	EYADVFHL	8	52	59	HLA-A*24:02	4951	EYADV-FHL	EYADVFHL	0.324162	0.32
	96	31	825	932	108	DYVYLPYPDPSRILGAGCFVDDIVKTDGTLMIERFVSLAIDAYPLTKHPNQEYADVFHLYLQYIRKLHDELTGHMLDMYSVMLTNDNTSRYWEPEFYEAMYTPHTVLQ	0.215	Probable NON-ANTIGEN	PYPDP, VKT, LTKHPNQEYA, DNTSRYWEPE, AMYTPH	0.454	PROBABLE NON-ALLERGEN	YADVFHLY	8	53	60	HLA-B*53:01	15577	YAD-VFHLY	YADVFHLY	0.257014	0.34
	97	31	825	932	108	DYVYLPYPDPSRILGAGCFVDDIVKTDGTLMIERFVSLAIDAYPLTKHPNQEYADVFHLYLQYIRKLHDELTGHMLDMYSVMLTNDNTSRYWEPEFYEAMYTPHTVLQ	0.215	Probable NON-ANTIGEN	PYPDP, VKT, LTKHPNQEYA, DNTSRYWEPE, AMYTPH	0.454	PROBABLE NON-ALLERGEN	EYADVFHL	8	52	59	HLA-A*23:01	4326	EYADVFH-L	EYADVFHL	0.2444	0.36
	98	31	825	932	108	DYVYLPYPDPSRILGAGCFVDDIVKTDGTLMIERFVSLAIDAYPLTKHPNQEYADVFHLYLQYIRKLHDELTGHMLDMYSVMLTNDNTSRYWEPEFYEAMYTPHTVLQ	0.215	Probable NON-ANTIGEN	PYPDP, VKT, LTKHPNQEYA, DNTSRYWEPE, AMYTPH	0.454	PROBABLE NON-ALLERGEN	TNDNTSRY	8	84	91	HLA-A*01:01	608	NA	TNDNTSRY	0.299727	0.37
	99	31	825	932	108	DYVYLPYPDPSRILGAGCFVDDIVKTDGTLMIERFVSLAIDAYPLTKHPNQEYADVFHLYLQYIRKLHDELTGHMLDMYSVMLTNDNTSRYWEPEFYEAMYTPHTVLQ	0.215	Probable NON-ANTIGEN	PYPDP, VKT, LTKHPNQEYA, DNTSRYWEPE, AMYTPH	0.454	PROBABLE NON-ALLERGEN	AMYTPHTV	8	99	106	HLA-A*02:03	1873	AMY-TPHTV	AMYTPHTV	0.350098	0.41
	100	31	825	932	108	DYVYLPYPDPSRILGAGCFVDDIVKTDGTLMIERFVSLAIDAYPLTKHPNQEYADVFHLYLQYIRKLHDELTGHMLDMYSVMLTNDNTSRYWEPEFYEAMYTPHTVLQ	0.215	Probable NON-ANTIGEN	PYPDP, VKT, LTKHPNQEYA, DNTSRYWEPE, AMYTPH	0.454	PROBABLE NON-ALLERGEN	YADVFHLY	8	53	60	HLA-A*30:02	6827	YAD-VFHLY	YADVFHLY	0.286382	0.49
	101	31	825	932	108	DYVYLPYPDPSRILGAGCFVDDIVKTDGTLMIERFVSLAIDAYPLTKHPNQEYADVFHLYLQYIRKLHDELTGHMLDMYSVMLTNDNTSRYWEPEFYEAMYTPHTVLQ	0.215	Probable NON-ANTIGEN	PYPDP, VKT, LTKHPNQEYA, DNTSRYWEPE, AMYTPH	0.454	PROBABLE NON-ALLERGEN	MYTPHTVL	8	100	107	HLA-A*24:02	4999	MYTPHTV-L	MYTPHTVL	0.191593	0.52
	102	31	825	932	108	DYVYLPYPDPSRILGAGCFVDDIVKTDGTLMIERFVSLAIDAYPLTKHPNQEYADVFHLYLQYIRKLHDELTGHMLDMYSVMLTNDNTSRYWEPEFYEAMYTPHTVLQ	0.215	Probable NON-ANTIGEN	PYPDP, VKT, LTKHPNQEYA, DNTSRYWEPE, AMYTPH	0.454	PROBABLE NON-ALLERGEN	NDNTSRYW	8	85	92	HLA-B*44:02	13734	NDN-TSRYW	NDNTSRYW	0.181265	0.52
	103	31	825	932	108	DYVYLPYPDPSRILGAGCFVDDIVKTDGTLMIERFVSLAIDAYPLTKHPNQEYADVFHLYLQYIRKLHDELTGHMLDMYSVMLTNDNTSRYWEPEFYEAMYTPHTVLQ	0.215	Probable NON-ANTIGEN	PYPDP, VKT, LTKHPNQEYA, DNTSRYWEPE, AMYTPH	0.454	PROBABLE NON-ALLERGEN	RYWEPEFY	8	90	97	HLA-A*30:02	6864	RYWEP-EFY	RYWEPEFY	0.268976	0.53
	104	31	825	932	108	DYVYLPYPDPSRILGAGCFVDDIVKTDGTLMIERFVSLAIDAYPLTKHPNQEYADVFHLYLQYIRKLHDELTGHMLDMYSVMLTNDNTSRYWEPEFYEAMYTPHTVLQ	0.215	Probable NON-ANTIGEN	PYPDP, VKT, LTKHPNQEYA, DNTSRYWEPE, AMYTPH	0.454	PROBABLE NON-ALLERGEN	YLQYIRKL	8	60	67	HLA-B*08:01	11209	YLQYIR-KL	YLQYIRKL	0.191022	0.61
	105	31	825	932	108	DYVYLPYPDPSRILGAGCFVDDIVKTDGTLMIERFVSLAIDAYPLTKHPNQEYADVFHLYLQYIRKLHDELTGHMLDMYSVMLTNDNTSRYWEPEFYEAMYTPHTVLQ	0.215	Probable NON-ANTIGEN	PYPDP, VKT, LTKHPNQEYA, DNTSRYWEPE, AMYTPH	0.454	PROBABLE NON-ALLERGEN	YADVFHLY	8	53	60	HLA-A*26:01	5577	YA-DVFHLY	YADVFHLY	0.11515	0.61
	106	31	825	932	108	DYVYLPYPDPSRILGAGCFVDDIVKTDGTLMIERFVSLAIDAYPLTKHPNQEYADVFHLYLQYIRKLHDELTGHMLDMYSVMLTNDNTSRYWEPEFYEAMYTPHTVLQ	0.215	Probable NON-ANTIGEN	PYPDP, VKT, LTKHPNQEYA, DNTSRYWEPE, AMYTPH	0.454	PROBABLE NON-ALLERGEN	NDNTSRYW	8	85	92	HLA-B*44:03	14359	NDN-TSRYW	NDNTSRYW	0.15141	0.67
	107	31	825	932	108	DYVYLPYPDPSRILGAGCFVDDIVKTDGTLMIERFVSLAIDAYPLTKHPNQEYADVFHLYLQYIRKLHDELTGHMLDMYSVMLTNDNTSRYWEPEFYEAMYTPHTVLQ	0.215	Probable NON-ANTIGEN	PYPDP, VKT, LTKHPNQEYA, DNTSRYWEPE, AMYTPH	0.454	PROBABLE NON-ALLERGEN	LAIDAYPL	8	38	45	HLA-B*51:01	14937	LAIDAYP-L	LAIDAYPL	0.205136	0.68
	108	31	825	932	108	DYVYLPYPDPSRILGAGCFVDDIVKTDGTLMIERFVSLAIDAYPLTKHPNQEYADVFHLYLQYIRKLHDELTGHMLDMYSVMLTNDNTSRYWEPEFYEAMYTPHTVLQ	0.215	Probable NON-ANTIGEN	PYPDP, VKT, LTKHPNQEYA, DNTSRYWEPE, AMYTPH	0.454	PROBABLE NON-ALLERGEN	AMYTPHTV	8	99	106	HLA-A*02:01	1248	AMY-TPHTV	AMYTPHTV	0.217938	0.74
	109	31	825	932	108	DYVYLPYPDPSRILGAGCFVDDIVKTDGTLMIERFVSLAIDAYPLTKHPNQEYADVFHLYLQYIRKLHDELTGHMLDMYSVMLTNDNTSRYWEPEFYEAMYTPHTVLQ	0.215	Probable NON-ANTIGEN	PYPDP, VKT, LTKHPNQEYA, DNTSRYWEPE, AMYTPH	0.454	PROBABLE NON-ALLERGEN	VFHLYLQY	8	56	63	HLA-A*30:02	6830	VFH-LYLQY	VFHLYLQY	0.18339	0.77
	110	31	825	932	108	DYVYLPYPDPSRILGAGCFVDDIVKTDGTLMIERFVSLAIDAYPLTKHPNQEYADVFHLYLQYIRKLHDELTGHMLDMYSVMLTNDNTSRYWEPEFYEAMYTPHTVLQ	0.215	Probable NON-ANTIGEN	PYPDP, VKT, LTKHPNQEYA, DNTSRYWEPE, AMYTPH	0.454	PROBABLE NON-ALLERGEN	MYTPHTVL	8	100	107	HLA-A*23:01	4374	MYTPHTV-L	MYTPHTVL	0.101576	0.79
	111	31	825	932	108	DYVYLPYPDPSRILGAGCFVDDIVKTDGTLMIERFVSLAIDAYPLTKHPNQEYADVFHLYLQYIRKLHDELTGHMLDMYSVMLTNDNTSRYWEPEFYEAMYTPHTVLQ	0.215	Probable NON-ANTIGEN	PYPDP, VKT, LTKHPNQEYA, DNTSRYWEPE, AMYTPH	0.454	PROBABLE NON-ALLERGEN	AMYTPHTV	8	99	106	HLA-B*51:01	14998	NA	AMYTPHTV	0.17336	0.8
	112	31	825	932	108	DYVYLPYPDPSRILGAGCFVDDIVKTDGTLMIERFVSLAIDAYPLTKHPNQEYADVFHLYLQYIRKLHDELTGHMLDMYSVMLTNDNTSRYWEPEFYEAMYTPHTVLQ	0.215	Probable NON-ANTIGEN	PYPDP, VKT, LTKHPNQEYA, DNTSRYWEPE, AMYTPH	0.454	PROBABLE NON-ALLERGEN	RYWEPEFY	8	90	97	HLA-A*23:01	4364	RYWEP-EFY	RYWEPEFY	0.089582	0.86
	113	31	825	932	108	DYVYLPYPDPSRILGAGCFVDDIVKTDGTLMIERFVSLAIDAYPLTKHPNQEYADVFHLYLQYIRKLHDELTGHMLDMYSVMLTNDNTSRYWEPEFYEAMYTPHTVLQ	0.215	Probable NON-ANTIGEN	PYPDP, VKT, LTKHPNQEYA, DNTSRYWEPE, AMYTPH	0.454	PROBABLE NON-ALLERGEN	YADVFHLY	8	53	60	HLA-A*24:02	4952	NA	YADVFHLY	0.094231	0.89
	114	31	825	932	108	DYVYLPYPDPSRILGAGCFVDDIVKTDGTLMIERFVSLAIDAYPLTKHPNQEYADVFHLYLQYIRKLHDELTGHMLDMYSVMLTNDNTSRYWEPEFYEAMYTPHTVLQ	0.215	Probable NON-ANTIGEN	PYPDP, VKT, LTKHPNQEYA, DNTSRYWEPE, AMYTPH	0.454	PROBABLE NON-ALLERGEN	YADVFHLY	8	53	60	HLA-A*23:01	4327	NA	YADVFHLY	0.085213	0.9
	115	31	825	932	108	DYVYLPYPDPSRILGAGCFVDDIVKTDGTLMIERFVSLAIDAYPLTKHPNQEYADVFHLYLQYIRKLHDELTGHMLDMYSVMLTNDNTSRYWEPEFYEAMYTPHTVLQ	0.215	Probable NON-ANTIGEN	PYPDP, VKT, LTKHPNQEYA, DNTSRYWEPE, AMYTPH	0.454	PROBABLE NON-ALLERGEN	RYWEPEFY	8	90	97	HLA-A*24:02	4989	RYWEP-EFY	RYWEPEFY	0.076712	0.99

## Sheet: NSP13
	S No	General Information					VaxiJen		B cell epitope		Allergenicity	MHC-1
		Seq_no	StartPos	EndPos	Length	Seq	VaxiJen_score	Remarks	B_cell_predicted_sequences	Score	Type	peptide	length	start	end	allele	peptide_index	core	icore	score	percentile
	1	1	1	17	17	AVGACVLCNSQTSLRCG	0.7512	Probable ANTIGEN	CNSQTSL	0.44	PROBABLE NON-ALLERGEN	NA	NA	NA	NA	NA	NA	NA	NA	NA	NA
	2	2	19	35	17	CIRRPFLCCKCCYDHVI	0.188	Probable NON-ANTIGEN	NA	NA	PROBABLE ALLERGEN	NA	NA	NA	NA	NA	NA	NA	NA	NA	NA
	3	3	37	45	9	TSHKLVLSV	0.1718	Probable NON-ANTIGEN	NA	NA	PROBABLE NON-ALLERGEN	NA	NA	NA	NA	NA	NA	NA	NA	NA	NA
	4	4	54	76	23	GCDVTDVTQLYLGGMSYYCKSHK	0.6391	Probable ANTIGEN	Q	0.436	PROBABLE NON-ALLERGEN	VTDVTQLY	8	4	11	HLA-A*01:01	26	VTD-VTQLY	VTDVTQLY	0.979769	0.01
	5	4	54	76	23	GCDVTDVTQLYLGGMSYYCKSHK	0.6391	Probable ANTIGEN	Q	0.436	PROBABLE NON-ALLERGEN	VTDVTQLY	8	4	11	HLA-A*30:02	2796	VTD-VTQLY	VTDVTQLY	0.29321	0.46
	6	4	54	76	23	GCDVTDVTQLYLGGMSYYCKSHK	0.6391	Probable ANTIGEN	Q	0.436	PROBABLE NON-ALLERGEN	VTDVTQLY	8	4	11	HLA-A*26:01	2242	VT-DVTQLY	VTDVTQLY	0.078957	0.85
	7	5	81	100	20	FPLCANGQVFGLYKNTCVGS	0.0303	Probable NON-ANTIGEN	FGLYKNT	0.441	PROBABLE ALLERGEN	NA	NA	NA	NA	NA	NA	NA	NA	NA	NA
	8	6	102	126	25	NVTDFNAIATCDWTNAGDYILANTC	0.5397	Probable ANTIGEN	TNAGD	0.436	PROBABLE ALLERGEN	NA	NA	NA	NA	NA	NA	NA	NA	NA	NA
	9	7	128	139	12	ERLKLFAAETLK	0.0496	Probable NON-ANTIGEN	FAA	0.406	PROBABLE ALLERGEN	NA	NA	NA	NA	NA	NA	NA	NA	NA	NA
	10	8	141	153	13	TEETFKLSYGIAT	0.5534	Probable ANTIGEN	FKLSY	0.436	PROBABLE NON-ALLERGEN	EETFKLSY	8	2	9	HLA-B*44:03	6170	EET-FKLSY	EETFKLSY	0.529785	0.23
	11	8	141	153	13	TEETFKLSYGIAT	0.5534	Probable ANTIGEN	FKLSY	0.436	PROBABLE NON-ALLERGEN	EETFKLSY	8	2	9	HLA-B*44:02	5893	EET-FKLSY	EETFKLSY	0.327038	0.33
	12	9	188	205	18	TKNSKVQIGEYTFEKGDY	0.8108	Probable ANTIGEN	IGEYTFE	0.438	PROBABLE ALLERGEN	YTFEKGDY	8	11	18	HLA-A*01:01	91	YTFEKGD-Y	YTFEKGDY	0.252418	0.45
	13	9	188	205	18	TKNSKVQIGEYTFEKGDY	0.8108	Probable ANTIGEN	IGEYTFE	0.438	PROBABLE ALLERGEN	YTFEKGDY	8	11	18	HLA-A*26:01	2307	YTFEKGD-Y	YTFEKGDY	0.107753	0.64
	14	9	188	205	18	TKNSKVQIGEYTFEKGDY	0.8108	Probable ANTIGEN	IGEYTFE	0.438	PROBABLE ALLERGEN	VQIGEYTF	8	6	13	HLA-B*15:01	5072	VQI-GEYTF	VQIGEYTF	0.267553	0.72
	15	10	209	232	24	VVYRGTTTYKLNVGDYFVLTSHTV	0.5527	Probable ANTIGEN	TTYKLN	0.441	PROBABLE ALLERGEN	FVLTSHTV	8	17	24	HLA-B*51:01	6479	FVL-TSHTV	FVLTSHTV	0.281137	0.5
	16	10	209	232	24	VVYRGTTTYKLNVGDYFVLTSHTV	0.5527	Probable ANTIGEN	TTYKLN	0.441	PROBABLE ALLERGEN	VYRGTTTY	8	2	9	HLA-A*30:02	2863	VYR-GTTTY	VYRGTTTY	0.239691	0.59
	17	10	209	232	24	VVYRGTTTYKLNVGDYFVLTSHTV	0.5527	Probable ANTIGEN	TTYKLN	0.441	PROBABLE ALLERGEN	VYRGTTTY	8	2	9	HLA-B*15:01	5079	NA	VYRGTTTY	0.22782	0.84
	18	11	234	252	19	PLSAPTLVPQEHYVRITGL	0.3945	Probable NON-ANTIGEN	VPQEHYVR	0.428	PROBABLE NON-ALLERGEN	TLVPQEHY	8	6	13	HLA-B*15:01	5100	TLV-PQEHY	TLVPQEHY	0.289398	0.66
	19	11	234	252	19	PLSAPTLVPQEHYVRITGL	0.3945	Probable NON-ANTIGEN	VPQEHYVR	0.428	PROBABLE NON-ALLERGEN	PQEHYVRI	8	9	16	HLA-B*51:01	6488	NA	PQEHYVRI	0.186722	0.75
	20	11	234	252	19	PLSAPTLVPQEHYVRITGL	0.3945	Probable NON-ANTIGEN	VPQEHYVR	0.428	PROBABLE NON-ALLERGEN	HYVRITGL	8	12	19	HLA-B*08:01	4829	H-YVRITGL	HYVRITGL	0.122127	0.95
	21	11	234	252	19	PLSAPTLVPQEHYVRITGL	0.3945	Probable NON-ANTIGEN	VPQEHYVR	0.428	PROBABLE NON-ALLERGEN	PLSAPTLV	8	1	8	HLA-B*51:01	6480	NA	PLSAPTLV	0.143512	0.98
	22	12	275	289	15	QKYSTLQGPPGTGKS	0.3258	Probable NON-ANTIGEN	TLQGPPGT	0.469	PROBABLE ALLERGEN	NA	NA	NA	NA	NA	NA	NA	NA	NA	NA
	23	13	298	340	43	YYPSARIVYTACSHAAVDALCEKALKYLPIDKCSRIIPARARV	0.242	Probable NON-ANTIGEN	LKYLPIDKCSRIIPA	0.455	PROBABLE NON-ALLERGEN	YPSARIVY	8	2	9	HLA-B*35:01	5393	YPS-ARIVY	YPSARIVY	0.884812	0.05
	24	13	298	340	43	YYPSARIVYTACSHAAVDALCEKALKYLPIDKCSRIIPARARV	0.242	Probable NON-ANTIGEN	LKYLPIDKCSRIIPA	0.455	PROBABLE NON-ALLERGEN	YPSARIVY	8	2	9	HLA-B*53:01	6778	YPSARIV-Y	YPSARIVY	0.324601	0.26
	25	13	298	340	43	YYPSARIVYTACSHAAVDALCEKALKYLPIDKCSRIIPARARV	0.242	Probable NON-ANTIGEN	LKYLPIDKCSRIIPA	0.455	PROBABLE NON-ALLERGEN	RIIPARAR	8	35	42	HLA-A*31:01	3210	RIIPARA-R	RIIPARAR	0.371733	0.59
	26	13	298	340	43	YYPSARIVYTACSHAAVDALCEKALKYLPIDKCSRIIPARARV	0.242	Probable NON-ANTIGEN	LKYLPIDKCSRIIPA	0.455	PROBABLE NON-ALLERGEN	DALCEKAL	8	18	25	HLA-B*51:01	6517	DALCE-KAL	DALCEKAL	0.160277	0.87
	27	13	298	340	43	YYPSARIVYTACSHAAVDALCEKALKYLPIDKCSRIIPARARV	0.242	Probable NON-ANTIGEN	LKYLPIDKCSRIIPA	0.455	PROBABLE NON-ALLERGEN	YPSARIVY	8	2	9	HLA-B*51:01	6501	YPSAR-IVY	YPSARIVY	0.14021	0.99
	28	14	352	364	13	LEQYVFCTVNALP	0.3669	Probable NON-ANTIGEN	NA	NA	PROBABLE ALLERGEN	NA	NA	NA	NA	NA	NA	NA	NA	NA	NA
	29	15	371	390	20	VVFDEISMATNYDLSVVNAR	1.0956	Probable ANTIGEN	EISMATNYDLS	0.464	PROBABLE ALLERGEN	DLSVVNAR	8	13	20	HLA-A*33:01	3784	DLS-VVNAR	DLSVVNAR	0.230888	0.6
	30	15	371	390	20	VVFDEISMATNYDLSVVNAR	1.0956	Probable ANTIGEN	EISMATNYDLS	0.464	PROBABLE ALLERGEN	EISMATNY	8	5	12	HLA-A*26:01	2391	EIS-MATNY	EISMATNY	0.105978	0.66
	31	16	393	412	20	AKHYVYIGDPAQLPAPRTLL	0.0896	Probable NON-ANTIGEN	GDPAQLPAP	0.453	PROBABLE NON-ALLERGEN	LPAPRTLL	8	13	20	HLA-B*07:02	4628	LPA-PRTLL	LPAPRTLL	0.910874	0.04
	32	16	393	412	20	AKHYVYIGDPAQLPAPRTLL	0.0896	Probable NON-ANTIGEN	GDPAQLPAP	0.453	PROBABLE NON-ALLERGEN	LPAPRTLL	8	13	20	HLA-B*08:01	4905	LPAPRTL-L	LPAPRTLL	0.668375	0.08
	33	16	393	412	20	AKHYVYIGDPAQLPAPRTLL	0.0896	Probable NON-ANTIGEN	GDPAQLPAP	0.453	PROBABLE NON-ALLERGEN	LPAPRTLL	8	13	20	HLA-B*51:01	6567	LPAPR-TLL	LPAPRTLL	0.650305	0.1
	34	16	393	412	20	AKHYVYIGDPAQLPAPRTLL	0.0896	Probable NON-ANTIGEN	GDPAQLPAP	0.453	PROBABLE NON-ALLERGEN	LPAPRTLL	8	13	20	HLA-B*53:01	6844	LPAPRT-LL	LPAPRTLL	0.115762	0.67
	35	16	393	412	20	AKHYVYIGDPAQLPAPRTLL	0.0896	Probable NON-ANTIGEN	GDPAQLPAP	0.453	PROBABLE NON-ALLERGEN	LPAPRTLL	8	13	20	HLA-B*35:01	5459	LPAPRTL-L	LPAPRTLL	0.131658	0.85
	36	17	414	430	17	KGTLEPEYFNSVCRLMK	0.5676	Probable ANTIGEN	PEYFNS	0.424	PROBABLE NON-ALLERGEN	EYFNSVCR	8	7	14	HLA-A*33:01	3804	EYFNS-VCR	EYFNSVCR	0.481185	0.18
	37	17	414	430	17	KGTLEPEYFNSVCRLMK	0.5676	Probable ANTIGEN	PEYFNS	0.424	PROBABLE NON-ALLERGEN	EPEYFNSV	8	5	12	HLA-B*51:01	6572	EP-EYFNSV	EPEYFNSV	0.377316	0.33
	38	18	432	443	12	IGPDMFLGTCRR	0.561	Probable ANTIGEN	NA	NA	PROBABLE NON-ALLERGEN	DMFLGTCR	8	4	11	HLA-A*33:01	3811	DMF-LGTCR	DMFLGTCR	0.26101	0.52
	39	19	445	453	9	PAEIVDTVS	0.5844	Probable ANTIGEN	NA	NA	PROBABLE ALLERGEN	PAEIVDTV	8	1	8	HLA-B*51:01	6583	NA	PAEIVDTV	0.191627	0.72
	40	20	467	479	13	KSAQCFKMFYKGV	0.4985	Probable ANTIGEN	KMF	0.403	PROBABLE ALLERGEN	AQCFKMFY	8	3	10	HLA-A*30:02	2986	AQC-FKMFY	AQCFKMFY	0.171997	0.82
	41	21	482	492	11	HDVSSAINRPQ	-0.0701	Probable NON-ANTIGEN	SAI	0.413	PROBABLE ALLERGEN	DVSSAINR	8	2	9	HLA-A*33:01	3822	DVSSAI-NR	DVSSAINR	0.250632	0.54
	42	21	482	492	11	HDVSSAINRPQ	-0.0701	Probable NON-ANTIGEN	SAI	0.413	PROBABLE ALLERGEN	DVSSAINR	8	2	9	HLA-A*68:01	4099	DVSSAI-NR	DVSSAINR	0.34647	0.99
	43	22	494	501	8	GVVREFLT	-1.3343	Probable NON-ANTIGEN	NA	NA	PROBABLE NON-ALLERGEN	NA	NA	NA	NA	NA	NA	NA	NA	NA	NA
	44	23	508	552	45	KAVFISPYNSQNAVASKILGLPTQTVDSSQGSEYDYVIFTQTTET	0.5927	Probable ANTIGEN	SPYNSQNAVAS, ILGLPTQTVDSSQGSEYD	0.498	PROBABLE ALLERGEN	SEYDYVIF	8	32	39	HLA-B*44:03	6350	SEYDYVI-F	SEYDYVIF	0.503298	0.24
	45	23	508	552	45	KAVFISPYNSQNAVASKILGLPTQTVDSSQGSEYDYVIFTQTTET	0.5927	Probable ANTIGEN	SPYNSQNAVAS, ILGLPTQTVDSSQGSEYD	0.498	PROBABLE ALLERGEN	SEYDYVIF	8	32	39	HLA-B*44:02	6073	SEYDYVI-F	SEYDYVIF	0.296379	0.36
	46	23	508	552	45	KAVFISPYNSQNAVASKILGLPTQTVDSSQGSEYDYVIFTQTTET	0.5927	Probable ANTIGEN	SPYNSQNAVAS, ILGLPTQTVDSSQGSEYD	0.498	PROBABLE ALLERGEN	SEYDYVIF	8	32	39	HLA-B*40:01	5796	SEYDYVI-F	SEYDYVIF	0.366781	0.4
	47	23	508	552	45	KAVFISPYNSQNAVASKILGLPTQTVDSSQGSEYDYVIFTQTTET	0.5927	Probable ANTIGEN	SPYNSQNAVAS, ILGLPTQTVDSSQGSEYD	0.498	PROBABLE ALLERGEN	LGLPTQTV	8	19	26	HLA-B*51:01	6614	LGLPT-QTV	LGLPTQTV	0.246187	0.58
	48	23	508	552	45	KAVFISPYNSQNAVASKILGLPTQTVDSSQGSEYDYVIFTQTTET	0.5927	Probable ANTIGEN	SPYNSQNAVAS, ILGLPTQTVDSSQGSEYD	0.498	PROBABLE ALLERGEN	DSSQGSEY	8	27	34	HLA-A*01:01	251	DSS-QGSEY	DSSQGSEY	0.130342	0.77
	49	23	508	552	45	KAVFISPYNSQNAVASKILGLPTQTVDSSQGSEYDYVIFTQTTET	0.5927	Probable ANTIGEN	SPYNSQNAVAS, ILGLPTQTVDSSQGSEYD	0.498	PROBABLE ALLERGEN	DSSQGSEY	8	27	34	HLA-B*35:01	5514	DSSQG-SEY	DSSQGSEY	0.107777	0.98
	50	24	554	575	22	HSCNVNRFNVAITRAKVGILCI	0.7601	Probable ANTIGEN	V	0.428	PROBABLE NON-ALLERGEN	VAITRAKV	8	10	17	HLA-B*51:01	6643	VAI-TRAKV	VAITRAKV	0.277305	0.51
	51	24	554	575	22	HSCNVNRFNVAITRAKVGILCI	0.7601	Probable ANTIGEN	V	0.428	PROBABLE NON-ALLERGEN	RFNVAITR	8	7	14	HLA-A*31:01	3316	RFN-VAITR	RFNVAITR	0.337666	0.66

## Sheet: NSP14
	S No	General Information					VaxiJen		B cell epitope		Allergenicity	MHC-1
		Seq_no	StartPos	EndPos	Length	Seq	VaxiJen_score	Remarks	B_cell_predicted_sequences	Score	Type	peptide	length	start	end	allele	peptide_index	core	icore	score	percentile
	1	1	2	15	14	ENVTGLFKDCSKVI	-0.454	Probable NON-ANTIGEN	KD	0.392	PROBABLE NON-ALLERGEN	NA	NA	NA	NA	NA	NA	NA	NA	NA	NA
	2	2	17	27	11	GLHPTQAPTHL	0.9081	Probable ANTIGEN	QA	0.394	PROBABLE ALLERGEN	NA	NA	NA	NA	NA	NA	NA	NA	NA	NA
	3	3	32	41	10	KFKTEGLCVD	1.368	Probable ANTIGEN	NA	NA	PROBABLE NON-ALLERGEN	NA	NA	NA	NA	NA	NA	NA	NA	NA	NA
	4	4	50	66	17	TYRRLISMMGFKMNYQV	0.5004	Probable ANTIGEN	FKM	0.421	PROBABLE NON-ALLERGEN	TYRRLISM	8	1	8	HLA-B*08:01	3109	TYR-RLISM	TYRRLISM	0.252926	0.44
	5	5	78	96	19	EAIRHVRAWIGFDVEGCHA	-0.0587	Probable NON-ANTIGEN	AWIGFDVE	0.442	PROBABLE ALLERGEN	AIRHVRAW	8	2	9	HLA-B*57:01	4576	NA	AIRHVRAW	0.345049	0.82
	6	6	98	112	15	REAVGTNLPLQLGFS	0.962	Probable ANTIGEN	TNLPLQ	0.451	PROBABLE ALLERGEN	REAVGTNL	8	1	8	HLA-B*40:01	3677	REA-VGTNL	REAVGTNL	0.75	0.13
	7	7	126	139	14	DTPNNTDFSRVSAK	0.8458	Probable ANTIGEN	NTDFSRV	0.459	PROBABLE NON-ALLERGEN	NA	NA	NA	NA	NA	NA	NA	NA	NA	NA
	8	8	145	156	12	QFKHLIPLMYKG	0.9117	Probable ANTIGEN	PL	0.395	PROBABLE NON-ALLERGEN	HLIPLMYK	8	4	11	HLA-A*03:01	783	HLI-PLMYK	HLIPLMYK	0.503767	0.33
	9	8	145	156	12	QFKHLIPLMYKG	0.9117	Probable ANTIGEN	PL	0.395	PROBABLE NON-ALLERGEN	QFKHLIPL	8	1	8	HLA-B*08:01	3146	QFK-HLIPL	QFKHLIPL	0.180411	0.65
	10	8	145	156	12	QFKHLIPLMYKG	0.9117	Probable ANTIGEN	PL	0.395	PROBABLE NON-ALLERGEN	KHLIPLMY	8	3	10	HLA-A*30:02	1874	K-HLIPLMY	KHLIPLMY	0.188469	0.75
	11	8	145	156	12	QFKHLIPLMYKG	0.9117	Probable ANTIGEN	PL	0.395	PROBABLE NON-ALLERGEN	HLIPLMYK	8	4	11	HLA-A*11:01	965	HLI-PLMYK	HLIPLMYK	0.227253	0.8
	12	9	164	176	13	IKIVQMLSDTLKN	0.1512	Probable NON-ANTIGEN	NA	NA	PROBABLE NON-ALLERGEN	NA	NA	NA	NA	NA	NA	NA	NA	NA	NA
	13	10	183	202	20	FVLWAHGFELTSMKYFVKIG	0.4541	Probable ANTIGEN	AHGFELTSMKYF	0.462	PROBABLE ALLERGEN	FELTSMKY	8	8	15	HLA-B*44:03	4074	FEL-TSMKY	FELTSMKY	0.20082	0.56
	14	10	183	202	20	FVLWAHGFELTSMKYFVKIG	0.4541	Probable ANTIGEN	AHGFELTSMKYF	0.462	PROBABLE ALLERGEN	FELTSMKY	8	8	15	HLA-B*44:02	3892	FEL-TSMKY	FELTSMKY	0.086774	0.77
	15	11	206	221	16	TCCLCDRRATCFSTAS	1.5524	Probable ANTIGEN	DRRATCF	0.447	PROBABLE ALLERGEN	NA	NA	NA	NA	NA	NA	NA	NA	NA	NA
	16	12	223	249	27	TYACWHHSIGFDYVYNPFMIDVQQWGF	0.8745	Probable ANTIGEN	HSIGF	0.431	PROBABLE NON-ALLERGEN	FMIDVQQW	8	18	25	HLA-B*53:01	4470	FMIDV-QQW	FMIDVQQW	0.305136	0.28
	17	12	223	249	27	TYACWHHSIGFDYVYNPFMIDVQQWGF	0.8745	Probable ANTIGEN	HSIGF	0.431	PROBABLE NON-ALLERGEN	FMIDVQQW	8	18	25	HLA-B*58:01	4834	FMIDV-QQW	FMIDVQQW	0.425881	0.39
	18	12	223	249	27	TYACWHHSIGFDYVYNPFMIDVQQWGF	0.8745	Probable ANTIGEN	HSIGF	0.431	PROBABLE NON-ALLERGEN	YACWHHSI	8	2	9	HLA-B*51:01	4272	YAC-WHHSI	YACWHHSI	0.346705	0.4
	19	12	223	249	27	TYACWHHSIGFDYVYNPFMIDVQQWGF	0.8745	Probable ANTIGEN	HSIGF	0.431	PROBABLE NON-ALLERGEN	FMIDVQQW	8	18	25	HLA-B*57:01	4652	FMIDV-QQW	FMIDVQQW	0.456622	0.59
	20	12	223	249	27	TYACWHHSIGFDYVYNPFMIDVQQWGF	0.8745	Probable ANTIGEN	HSIGF	0.431	PROBABLE NON-ALLERGEN	YVYNPFMI	8	13	20	HLA-B*51:01	4283	YVY-NPFMI	YVYNPFMI	0.21902	0.64
	21	12	223	249	27	TYACWHHSIGFDYVYNPFMIDVQQWGF	0.8745	Probable ANTIGEN	HSIGF	0.431	PROBABLE NON-ALLERGEN	FMIDVQQW	8	18	25	HLA-A*32:01	2286	FMID-VQQW	FMIDVQQW	0.070839	0.98
	22	13	256	286	31	NHDLYCQVHGNAHVASCDAIMTRCLAVHECF	0.1917	Probable NON-ANTIGEN	CQVHGNAHVAS	0.442	PROBABLE ALLERGEN	DAIMTRCL	8	18	25	HLA-B*51:01	4308	DAI-MTRCL	DAIMTRCL	0.424837	0.27
	23	14	305	314	10	INAACRKVQH	1.0883	Probable ANTIGEN	NA	NA	PROBABLE ALLERGEN	NA	NA	NA	NA	NA	NA	NA	NA	NA	NA
	24	15	316	326	11	VVKAALLADKF	0.1766	Probable NON-ANTIGEN	L	0.374	PROBABLE ALLERGEN	NA	NA	NA	NA	NA	NA	NA	NA	NA	NA
	25	16	328	346	19	VLHDIGNPKAIKCVPQADV	0.027	Probable NON-ANTIGEN	IGNPKAIKCVP	0.463	PROBABLE ALLERGEN	NPKAIKCV	8	7	14	HLA-B*51:01	4328	NP-KAIKCV	NPKAIKCV	0.23978	0.6
	26	17	350	359	10	FYDAQPCSDK	-0.1244	Probable NON-ANTIGEN	QP	0.4	PROBABLE NON-ALLERGEN	NA	NA	NA	NA	NA	NA	NA	NA	NA	NA
	27	18	361	370	10	YKIEELFYSY	0.5596	Probable ANTIGEN	EL	0.394	PROBABLE NON-ALLERGEN	IEELFYSY	8	3	10	HLA-B*44:03	4157	IE-ELFYSY	IEELFYSY	0.133916	0.7
	28	18	361	370	10	YKIEELFYSY	0.5596	Probable ANTIGEN	EL	0.394	PROBABLE NON-ALLERGEN	IEELFYSY	8	3	10	HLA-B*44:02	3975	IE-ELFYSY	IEELFYSY	0.060428	0.96
	29	19	382	389	8	CLFWNCNV	-0.2381	Probable NON-ANTIGEN	NA	NA	PROBABLE NON-ALLERGEN	NA	NA	NA	NA	NA	NA	NA	NA	NA	NA
	30	20	395	419	25	NSIVCRFDTRVLSNLNLPGCDGGSL	-0.0248	Probable NON-ANTIGEN	TRVLSNLNLPGCD	0.469	PROBABLE NON-ALLERGEN	NA	NA	NA	NA	NA	NA	NA	NA	NA	NA
	31	21	503	515	13	SAGFSLWVYKQFD	0.5608	Probable ANTIGEN	LWVY	0.401	PROBABLE ALLERGEN	NA	NA	NA	NA	NA	NA	NA	NA	NA	NA
	32	22	517	527	11	YNLWNTFTRLQ	-0.03	Probable NON-ANTIGEN	NTF	0.406	PROBABLE NON-ALLERGEN	NLWNTFTR	8	2	9	HLA-A*33:01	2546	NLW-NTFTR	NLWNTFTR	0.186403	0.79

[truncated: 5 more sheets: NSP15, Spike, Envelope, Membrane, Nucleocapsid]
