# Supplementary material for: Conserved SARS-CoV-2 Viral Peptides as Potential Prophylactic and Therapeutic Targets
Source: Research Square preprint supplement (doi:10.21203/rs.3.rs-6798845/v1), 2025-06-17
Supplement: Supplementary file 2 [file 5f585c6c569d3f1ee7c9f726.xlsx]

## Sheet: Frequency
	S No	Protein	No of conserved sequences	No of antigenic sequences	No of non-allergenic sequences	No of non-allergenic antigens
	1	Spike	49	27	25	11
	2	Envelope	2	2	1	1
	3	Membrane	7	5	5	4
	4	Nucleocapsid	14	7	5	2
	5	NSP1	7	4	3	2
	6	NSP3	59	42	30	21
	7	NSP4	20	10	11	6
	8	NSP5	11	4	5	2
	9	NSP6	9	7	5	4
	10	NSP8	1	1	0	0
	11	NSP10	0	0	0	0
	12	NSP12	31	18	10	6
	13	NSP13	24	13	11	6
	14	NSP14	22	12	12	7
	15	NSP15	14	9	4	2
	16	NSP16	0	0	0	0

## Sheet: NSP1
		StartPos	EndPos	Length	Seq	Score	Remarks	Allergenicity
	3	50	59	10	TCGLVEVEKG	1.0034	Probable ANTIGEN	NON-ALLERGEN
	5	125	134	10	KNGNKGAGGH	1.0379	Probable ANTIGEN	NON-ALLERGEN

## Sheet: NSP3
		StartPos	EndPos	Length	Seq	Score	Remarks	Allergenicity
	1	1	8	8	APTKVTFG	1.4851	Probable ANTIGEN	NON-ALLERGEN
	5	96	107	12	FKLASHMYCSFY	0.465	Probable ANTIGEN	NON-ALLERGEN
	7	157	165	9	QEEDWLDDD	0.6145	Probable ANTIGEN	NON-ALLERGEN
	11	356	363	8	YLAVFDKN	0.5656	Probable ANTIGEN	NON-ALLERGEN
	12	435	461	27	LLLYIDINGNLHPDSATLVSDIDITFL	0.6641	Probable ANTIGEN	NON-ALLERGEN
	15	535	557	23	FYILPSIISNEKQEILGTVSWNL	0.9724	Probable ANTIGEN	NON-ALLERGEN
	20	740	748	9	TLLSLREVR	1.7234	Probable ANTIGEN	NON-ALLERGEN
	21	750	770	21	IKVFTTVDNINLHTQVVDMSM	0.4863	Probable ANTIGEN	NON-ALLERGEN
	26	846	859	14	LTSIKWADNNCYLA	1.1968	Probable ANTIGEN	NON-ALLERGEN
	28	875	895	21	PALQDAYYRARAGEAANFCAL	0.7391	Probable ANTIGEN	NON-ALLERGEN
	31	952	966	15	YMGTLSYEQFKKGVQ	0.5198	Probable ANTIGEN	NON-ALLERGEN
	33	1007	1021	15	SEYTGNYQCGHYKHI	0.4883	Probable ANTIGEN	NON-ALLERGEN
	35	1045	1062	18	ITDVFYKENSYTTTIKPV	0.5618	Probable ANTIGEN	NON-ALLERGEN
	37	1106	1119	14	SFDNFKFVCDNIKF	1.038	Probable ANTIGEN	NON-ALLERGEN
	40	1161	1178	18	FKKGAKLLHKPIVWHVNN	0.5376	Probable ANTIGEN	NON-ALLERGEN
	41	1390	1402	13	KFCLEASFNYLKS	0.6666	Probable ANTIGEN	NON-ALLERGEN
	42	1413	1422	10	IWFLLLSVCL	0.4379	Probable ANTIGEN	NON-ALLERGEN
	46	1589	1600	12	STCMMCYKRNRA	1.2931	Probable ANTIGEN	NON-ALLERGEN
	49	1694	1710	17	TYERHSLSHFVNLDNLR	0.4635	Probable ANTIGEN	NON-ALLERGEN
	50	1718	1735	18	LPINVIVFDGKSKCEESS	0.5862	Probable ANTIGEN	NON-ALLERGEN
	59	1893	1945	53	LIWNVKDFMSLSEQLRKQIRSAAKKNNLPFKLTCATTRQVVNVVTTKIALKGG	0.8775	Probable ANTIGEN	NON-ALLERGEN

## Sheet: NSP4
		StartPos	EndPos	Length	Seq	Score	Remarks	Allergenicity
	4	61	94	34	DTCFANKHADFDTWFSQRGGSYTNDKACPLIAAV	0.8421	Probable ANTIGEN	NON-ALLERGEN
	5	97	111	15	REVGFVVPGLPGTIL	0.8981	Probable ANTIGEN	NON-ALLERGEN
	7	129	136	8	VGNICYTP	1.895	Probable ANTIGEN	NON-ALLERGEN
	8	138	145	8	KLIEYTDF	1.2404	Probable ANTIGEN	NON-ALLERGEN
	14	253	263	11	GVFCGVDAVNL	0.9314	Probable ANTIGEN	NON-ALLERGEN
	17	387	400	14	TKHFYWFFSNYLKR	0.4155	Probable ANTIGEN	NON-ALLERGEN

## Sheet: NSP5
	StartPos	EndPos	Length	Seq	Score	Remarks	Allergenicity
3	36	74	39	VYCPRHVICTSEDMLNPNYEDLLIRKSNHNFLVQAGNVQ	0.6809	Probable ANTIGEN	NON-ALLERGEN
9	248	259	12	DILGPLSAQTGI	0.5306	Probable ANTIGEN	NON-ALLERGEN

## Sheet: NSP6
		StartPos	EndPos	Length	Seq	Score	Remarks	Allergenicity
	2	12	23	12	HWLLLTILTSLL	0.4003	Probable ANTIGEN	NON-ALLERGEN
	3	25	34	10	LVQSTQWSLF	0.8341	Probable ANTIGEN	NON-ALLERGEN
	4	169	179	11	ISVTSNYSGVV	0.8981	Probable ANTIGEN	NON-ALLERGEN
	7	222	231	10	TCYFGLFCLL	0.9672	Probable ANTIGEN	NON-ALLERGEN

## Sheet: NSP12
	StartPos	EndPos	Length	Seq	Score	Remarks	Allergenicity
8	186	226	41	LLKTVQFCDAMRNAGIVGVLTLDNQDLNGNWYDFGDFIQTT	0.8265	Probable ANTIGEN	PROBABLE NON-ALLERGEN
12	294	322	29	YHPNCVNCLDDRCILHCANFNVLFSTVFP	0.7101	Probable ANTIGEN	PROBABLE NON-ALLERGEN
16	401	462	62	LTNNVAFQTVKPGNFNKDFYDFAVSKGFFKEGSSVELKHFFFAQDGNAAISDYDYYRYNLPT	0.5337	Probable ANTIGEN	PROBABLE NON-ALLERGEN
17	464	486	23	CDIRQLLFVVEVVDKYFDCYDGG	0.6044	Probable ANTIGEN	PROBABLE NON-ALLERGEN
24	672	693	22	SLYVKPGGTSSGDATTAYANSV	0.5697	Probable ANTIGEN	PROBABLE NON-ALLERGEN
26	720	738	19	VRNLQHRLYECLYRNRDVD	0.4299	Probable ANTIGEN	PROBABLE NON-ALLERGEN

## Sheet: NSP13
	StartPos	EndPos	Length	Seq	Score	Remarks	allergenicity
1	1	17	17	AVGACVLCNSQTSLRCG	0.7512	Probable ANTIGEN	PROBABLE NON-ALLERGEN
4	54	76	23	GCDVTDVTQLYLGGMSYYCKSHK	0.6391	Probable ANTIGEN	PROBABLE NON-ALLERGEN
8	141	153	13	TEETFKLSYGIAT	0.5534	Probable ANTIGEN	PROBABLE NON-ALLERGEN
17	414	430	17	KGTLEPEYFNSVCRLMK	0.5676	Probable ANTIGEN	PROBABLE NON-ALLERGEN
18	432	443	12	IGPDMFLGTCRR	0.561	Probable ANTIGEN	PROBABLE NON-ALLERGEN
24	554	575	22	HSCNVNRFNVAITRAKVGILCI	0.7601	Probable ANTIGEN	PROBABLE NON-ALLERGEN

## Sheet: NSP14
	StartPos	EndPos	Length	Seq	Score	Remarks	Allergenicity
3	32	41	10	KFKTEGLCVD	1.368	Probable ANTIGEN	PROBABLE NON-ALLERGEN
4	50	66	17	TYRRLISMMGFKMNYQV	0.5004	Probable ANTIGEN	PROBABLE NON-ALLERGEN
7	126	139	14	DTPNNTDFSRVSAK	0.8458	Probable ANTIGEN	PROBABLE NON-ALLERGEN
8	145	156	12	QFKHLIPLMYKG	0.9117	Probable ANTIGEN	PROBABLE NON-ALLERGEN
12	223	249	27	TYACWHHSIGFDYVYNPFMIDVQQWGF	0.8745	Probable ANTIGEN	PROBABLE NON-ALLERGEN
18	361	370	10	YKIEELFYSY	0.5596	Probable ANTIGEN	PROBABLE NON-ALLERGEN

## Sheet: NSP15
	StartPos	EndPos	Length	Seq	Score	Remarks	Allergenicity
1	1	9	9	SLENVAFNV	1.0488	Probable ANTIGEN	PROBABLE NON-ALLERGEN
13	321	336	16	TIDYTEISFMLWCKDG	1.2747	Probable ANTIGEN	PROBABLE NON-ALLERGEN

[truncated: 4 more sheets: Spike, Envelope, Membrane, Nucleocapsid]
